## Non-Coding Genetic Analysis Implicates Interleukin 18 Receptor Accessory Protein 3'UTR in Amyotrophic Lateral Sclerosis

### Authors:

Chen Eitan<sup>1\*</sup>, Aviad Siany<sup>1\*</sup>, Elad Barkan<sup>2</sup>, Tsviya Olender<sup>1</sup>, Kristel R. van Eijk<sup>3</sup>, Matthieu Moisse<sup>4,5</sup>, Sali M. K. Farhan<sup>6,7</sup>, Yehuda M. Danino<sup>1</sup>, Eran Yanowski<sup>1</sup>, Hagai Marmor-Kollet<sup>1</sup>, Natalia Rivkin<sup>1</sup>, Nancy Yacovzada<sup>1,2</sup>, Shu-Ting Hung<sup>8-10</sup>, Johnathan Cooper-Knock<sup>11</sup>, Chien-Hsiung Yu<sup>12,13</sup>, Cynthia Louis<sup>12,13</sup>, Seth L. Masters<sup>12,13</sup>, Kevin P. Kenna<sup>3</sup>, Rick A. A. van der Spek<sup>3</sup>, William Sproviero<sup>14</sup>, Ahmad Al Khleifat<sup>14</sup>, Alfredo Iacoangeli<sup>14</sup>, Aleksey Shatunov<sup>14</sup>, Ashley R. Jones<sup>14</sup>, Yael Elbaz-Alon<sup>1</sup>, Yahel Cohen<sup>1</sup>, Elik Chapnik<sup>1</sup>, Daphna Rothschild<sup>2,15,16</sup>, Omer Weissbrod<sup>2</sup>, Gilad Beck<sup>17</sup>, Elena Ainbinder<sup>17</sup>, Shifra Ben-Dor<sup>17</sup>, Sebastian Werneburg<sup>18</sup>, Dorothy P. Schafer<sup>18</sup>, Robert H. Brown Jr<sup>19</sup>, Pamela J. Shaw<sup>11</sup>, Philip Van Damme<sup>4,5,20</sup>, Leonard H. van den Berg<sup>3</sup>, Hemali P. Phatnani<sup>21</sup>, Eran Segal<sup>2</sup>, Justin K. Ichida<sup>8-10</sup>, Ammar Al-Chalabi<sup>14,22</sup>, Jan H. Veldink<sup>3</sup>, Project MinE ALS Sequencing Consortium<sup>23</sup>, NYGC ALS Consortium<sup>23</sup> and Eran Hornstein<sup>1#</sup>

### Affiliations:

<sup>1</sup>Department of Molecular Genetics, Weizmann Institute of Science, Rehovot 7610001, Israel.

<sup>2</sup>Department of Computer Science And Applied Math, Weizmann Institute of Science, Rehovot 7610001, Israel.

<sup>3</sup>Department of Neurology, University Medical Center Utrecht Brain Center, Utrecht University, Utrecht, 3584 CG, The Netherlands.

<sup>4</sup>KU Leuven - University of Leuven, Department of Neurosciences, Experimental Neurology, B-3000 Leuven, Belgium.

<sup>5</sup>VIB, Center for Brain & Disease Research, Laboratory of Neurobiology, Leuven, Belgium.

<sup>6</sup>Analytic and Translational Genetics Unit, Center for Genomic Medicine, Massachusetts General Hospital and Harvard Medical School, Boston, MA 02114, USA.

<sup>7</sup>Stanley Center for Psychiatric Research, Broad Institute of MIT and Harvard, Cambridge, MA 02142, USA.

<sup>8</sup>Department of Stem Cell Biology and Regenerative Medicine, Keck School of Medicine, University of Southern California, Los Angeles, CA 90033, USA.

<sup>9</sup>Eli and Edythe Broad CIRM Center for Regenerative Medicine and Stem Cell Research at USC, Los Angeles, CA 90033, USA.

<sup>10</sup>Zilkha Neurogenetic Institute, Keck School of Medicine of the University of Southern California, Los Angeles, CA 90033, USA.

<sup>11</sup>Sheffield Institute for Translational Neuroscience (SITraN), University of Sheffield, Sheffield S10 2HQ, UK.

<sup>12</sup>Inflammation Division, The Walter and Eliza Hall Institute of Medical Research, Parkville 3052, Australia.

<sup>13</sup>Department of Medical Biology, University of Melbourne, Parkville 3010, Australia.

<sup>14</sup>King's College London, Maurice Wohl Clinical Neuroscience Institute, Institute of Psychiatry, Psychology & Neuroscience, De Crespigny Park, London, SE5 8AF, United Kingdom.

<sup>15</sup>Department of Developmental Biology, Stanford University, Stanford, CA 94305, USA

<sup>16</sup>Department of Genetics, Stanford University, Stanford, CA 94305, USA

<sup>17</sup>Department of Life Sciences Core Facilities, Weizmann Institute of Science, Rehovot 7610001, Israel.

<sup>18</sup>Department of Neurobiology, Brudnick Neuropsychiatric Research Institute, University of Massachusetts Chan Medical School, Worcester, MA 01605, USA.

<sup>19</sup>Department of Neurology, University of Massachusetts Medical School, Worcester, MA 01655, USA.

<sup>20</sup>University Hospitals Leuven, Department of Neurology, Leuven, Belgium.

<sup>21</sup>Center for Genomics of Neurodegenerative Disease, New York Genome Center.

<sup>22</sup>King's College Hospital, Denmark Hill, London, SE5 9RS, United Kingdom.

<sup>23</sup>A list of Consortiums PIs and affiliations appears in the Supplementary Information.

\*These authors contributed equally to this work

#Corresponding author. Tel: +972 89346215; Fax: +972 89342108; E-mail: Eran.hornstein@weizmann.ac.il

**Abstract:**

The non-coding genome is substantially larger than the protein-coding genome but is largely unexplored by genetic association studies. Here, we performed region-based burden analysis of >25,000 variants in untranslated regions of 6,139 amyotrophic lateral sclerosis (ALS) whole-genomes and 70,403 non-ALS controls. We identified Interleukin-18 Receptor Accessory Protein (IL18RAP) 3'UTR variants significantly enriched in non-ALS genomes, replicated in an independent cohort, and associated with a five-fold reduced risk of developing ALS. Variant IL18RAP 3'UTR reduces mRNA stability and the binding of RNA-binding proteins. Variant IL18RAP 3'UTR further dampens neurotoxicity of human iPSC-derived C9orf72-ALS microglia that depends on NF- $\kappa$ B signaling. Therefore, the variant IL18RAP 3'UTR provides survival advantage for motor neurons co-cultured with C9-ALS microglia. The study reveals direct genetic evidence and therapeutic targets for neuro-inflammation, and emphasizes the importance of non-coding genetic association studies.

**One Sentence Summary:** Non-coding genetic variants in IL-18 receptor 3'UTR decrease ALS risk by modifying IL-18-NF- $\kappa$ B signaling in microglia.

1 **[Main Text:]**

2 **Introduction**

3 Genomic sequencing technologies facilitate the identification of variants in open reading frames (ORFs). Although  
4 allelic variants in non-coding regions are expected to be numerous<sup>1,2</sup> they are largely overlooked.

5 Amyotrophic lateral sclerosis (ALS) is a fatal neurodegenerative syndrome, primarily affecting the human motor  
6 neuron system with a strong genetic predisposing component<sup>3,4</sup>. Thus far, mutations in approximately 25 protein-  
7 coding genes have been associated with ALS<sup>3,5-7</sup>. Hexanucleotide repeat expansion in an intronic sequence of the  
8 *C9orf72* gene is the most common genetic cause of ALS<sup>8-10</sup> and enrichment of variants was recently discovered in  
9 the CAV1 enhancer<sup>11</sup>. However, non-coding nucleotide variants in ALS have yet to be systematically explored.

10 Burden analysis is a genetics approach that is based on the rationale that different rare variants in the same gene  
11 may have a cumulative contribution<sup>12</sup>. Therefore, burden analysis allows the identification of genes containing an  
12 excess of rare and presumably functional variation in cases relative to controls. Although de novo mutations in  
13 non-coding regions were recently shown in family-based autism studies<sup>13</sup>, variants in non-coding regions are not  
14 routinely included in rare-variant burden association studies. The application of burden analysis to non-coding  
15 regulatory variation is constrained by the availability of whole-genome sequencing (WGS) data, and the ability to  
16 recognize functional variants in non-coding regulatory regions, which is currently far less effective than for  
17 protein-coding genes.

18 MicroRNAs (miRNAs) are endogenous posttranscriptional repressors that silence mRNA expression through  
19 sequence complementarity. miRNA primarily act on 3' untranslated regions (3'UTRs)<sup>14</sup>, which are non-coding  
20 parts of messenger RNAs (mRNAs) and often regulate degradation and translation<sup>15</sup>. miRNA dysregulation has  
21 been implicated in ALS pathogenesis, and ALS-associated RNA-binding proteins, TARDBP/TDP-43 and FUS,  
22 regulate miRNA biogenesis<sup>16-27</sup>.

23 Microglia are the resident immune cells of the central nervous system and are the primary mediators of  
24 neuroinflammation in neurodegeneration<sup>28, 29</sup>. In ALS, microglia induce motor neuron death via the classical  
25 nuclear factor-kappa B (NF-κB) pathway<sup>29-35</sup>. One suggested mechanism for microglia-induced cytotoxicity is  
26 based on detection of extracellular TDP-43 aggregates and triggering of IL-1beta and Interleukin 18 (IL-18; also  
27 known as: IGIF/IL1F4/IL-1g) signaling<sup>31</sup>. Accordingly, IL-18 levels are elevated in ALS patient tissues and biofluids  
28<sup>36-39</sup>, supporting a role for IL-18 signaling in the disease's neuroinflammatory milieu<sup>40</sup>. IL-18 also induces NF-κB  
29 signaling by binding and dimerising the two IL-18 receptor subunits, IL18RAP (also known as: AcPL/CD218b/IL-

30 18R-Beta) and IL18R1<sup>31, 40-48</sup>. In turn, NF-κB contributes to microglial inflammation<sup>49, 50</sup>, microglial-mediated motor  
31 neuron death<sup>51</sup> and to disease progression<sup>52, 53</sup>.

32 Here, we identified rare variants in miRNAs and 3'UTR of mRNAs, and performed collapsed genetic analysis<sup>54</sup> to  
33 test if these regulatory RNAs are associated with ALS. We discovered an enrichment of rare variants in the IL18RAP  
34 3'UTR and provide experimental evidence for their relevance to human ALS. Therefore, non-coding variant  
35 analysis reveals a genetic and mechanistic link for the IL-18 pathway in ALS and encourages systematic exploration  
36 of non-coding regions to uncover genetic mechanisms of disease.

## 37 Results

38 To test whether genetic variations in non-coding regulatory regions are associated with ALS, we analyzed regions  
39 of interest in WGS data from the Project MinE ALS sequencing consortium <sup>55</sup> (Supplementary Fig. 1A,B and  
40 Supplementary Tables 1,2). The discovery cohort consisted of 3,955 ALS patients and 1,819 age- and sex-matched  
41 controls, for a total of 5,774 whole-genomes from the Netherlands, Belgium, Ireland, Spain, United Kingdom,  
42 United States, and Turkey (Project MinE Datafreeze 1). We performed a region-based burden test, in which rare  
43 genetic variants with minor allele frequencies (MAF)  $\leq 0.01$  are binned together, to weight their contribution to  
44 disease, in 295 non-coding 3'UTRs of candidate genes, linked to sporadic ALS via GWAS <sup>56</sup> or genes encoding RNA-  
45 binding proteins (Supplementary Table 3). In addition we tested all autosomal human-pre-miRNA genes (1,750  
46 pre-miRNAs; miRBase v20 <sup>57</sup>).

47 As a positive control, we also performed an association analysis of rare variants in the open reading frames of  
48 these 295 genes. For the proteins, we called variants that are predicted to cause frameshifting, alternative splicing,  
49 an abnormal stop codon, or a deleterious non-synonymous amino acid substitution that were detected in  $\geq 3$  of 7  
50 independent dbNSFP prediction algorithms <sup>58</sup> (Fig. 1A and Supplementary Table 3). In total, 30,721 rare qualifying  
51 variants were identified (Supplementary Table 4). Optimized Sequence Kernel Association Test (SKAT-O) <sup>59</sup>  
52 identified a significant excess of deleterious minor alleles in the ALS genes *NEK1* (127 cases; 19 controls [3.21%;  
53 1.04%]:  $P = 8 \times 10^{-7}$ ;  $P_{corrected} = 2.3 \times 10^{-4}$ ), comparable with a reported prevalence of 3% <sup>60</sup>, and in *SOD1* (36 cases  
54 [0.91%]; 0 controls:  $P = 2.6 \times 10^{-4}$ ;  $P_{corrected} = 3.73 \times 10^{-2}$ ) <sup>61</sup>, which is below the reported 2% prevalence <sup>5, 62</sup> (Fig. 1B,  
55 Supplementary Fig. 2A and Supplementary Table 5). Other known ALS genes did not reach statistical significance  
56 (Supplementary Table 3), consistent with reported statistical power limitations of Project MinE WGS data in  
57 assessing the burden of rare variants <sup>63</sup>. Our analysis did not consider the *C9orf72* hexanucleotide (GGGGCC)  
58 repeat expansion region.

59 The burden of rare variants did not identify a disease association for any of the autosomal pre-miRNAs in the  
60 human genome, nor for any of the predicted genetic networks based on variants aggregated over specific mature  
61 miRNAs and their cognate downstream 3'UTR targets. This may be because the small size of miRNA genes makes  
62 genetic aggregation studies particularly challenging (Supplementary Fig. 2B,C).

63 When we tested the burden of variants in 3'UTRs, the strongest association found was for the 3'UTR of *IL18RAP*  
64 (Fig. 1B, Supplementary Fig. 2D and Supplementary Table 5). This association was higher than expected at random  
65 ( $P = 1.93 \times 10^{-5}$ ,  $P_{corrected} = 5.41 \times 10^{-3}$ ) and from the association gained for all protein-coding ALS genes in this cohort,

66 with the exception of *NEK1*. Notably, the signal was more prevalent in controls [12/1819, 0.66%] relative to ALS  
67 patients [6/3955, 0.15%], indicating that these variants might act as protective variants against ALS.

68 IL18RAP 3'UTR also ranked as the top hit by three other algorithms – the Sequence Kernel Association Test (SKAT,  
69  $P = 1.77 \times 10^{-5}$ ; permuted P-value  $< 10^{-4}$ ), the Combined Multivariate and Collapsing (CMC,  $P = 8.78 \times 10^{-4}$ ) or  
70 Variable Threshold (VT) with permutation analysis (permuted P-value =  $1.75 \times 10^{-3}$ , suggesting that the  
71 association does not depend on a particular statistical genetics method (Supplementary Fig. 3A-C). Furthermore,  
72 when we tested the burden of variants in miRNA recognition elements (MREs) in 3'UTRs (variants that are  
73 potentially either abrogating conserved miRNA binding sites or creating new miRNA binding sites in 3'UTRs), the  
74 strongest association was also gained for the 3'UTR of IL18RAP (SKAT-O P-value =  $3.42 \times 10^{-5}$ , Supplementary Fig.  
75 3D, see Methods). A diagram of variants in IL18RAP 3'UTR is presented in Supplementary Fig. 3E and a description  
76 of IL18RAP 3'UTR variants in Supplementary Table 6. The top 10 principal components (PCs) of common variant-  
77 based ancestry information and sex were included as covariates in the SKAT-O, SKAT, CMC, and VT analyses.

78 In addition, genome-wide analysis of all known human 3'UTRs (16,809 3'UTRs from RefSeq<sup>64</sup>) identified IL18RAP  
79 3'UTR as the most significant 3'UTR associated with ALS in the Project MinE cohort (Fig. 1C).

80 Finally, we tested if different functional genetic classes were enriched overall for ALS risk/protection variants by  
81 testing the burden of rare variants in all genes pooled together. SKAT-O signal for open reading frames of 295  
82 proteins, the 3'UTR of the same 295 genes, all autosomal pre-miRNA genes [miRBase v20;<sup>57</sup>] or networks  
83 composed of all miRNA genes and their cognate set of downstream targets (TargetScan) were all not significant  
84 (P-values of 0.024, 0.59, 0.08, 0.58, respectively). Therefore, results from these burden tests do not implicate any  
85 of the functional class of genomic elements in ALS risk.

86 Because the number of ALS genomes was ~2.17-fold larger than the number of controls, the data depict a 4.35-  
87 fold enrichment in the abundance of variants in controls over cases. IL18RAP 3'UTR potentially-protective variants  
88 reduced the disease odds ratio by five-fold (OR = 0.23; Fig. 2A), and was consistent across independent population  
89 strata (Fig. 2B), whereas *NEK1* and *SOD1* increased the disease odds ratio (OR = 3.14, 33.89, respectively; Fig. 2A).

90 To determine if the rare IL18RAP 3'UTR variants are depleted in another ALS cohort, we performed independent  
91 replication studies. Similar results for rare IL18RAP 3'UTR variants were reproduced in the New York Genome  
92 Center (NYGC) ALS Consortium cohort (2,184 ALS genomes), which was studied against: (i) 263 non-neurological  
93 controls from the NYGC; (ii) 62,784 non-ALS genomes from NHLBI's Trans-Omics for Precision Medicine (TOPMed);  
94 and (iii) 5,537 non-ALS genomes from gnomAD. This replication effort yielded a joint analysis P-value =  $9.58 \times 10^{-4}$   
95 ( $\chi^2$  with Yate's correction; OR=0.32; 95% CI: 0.16 – 0.64; Fig. 2C and Supplementary Table 7). Combining this



96 cohort with our discovery cohort from Project MinE, yielded a superior joint P-value  $< 1.00 \times 10^{-5}$  ( $\chi^2$  with Yate's  
97 correction; OR=0.20; 95% CI: 0.12 – 0.34; [Fig. 2C](#)). A meta-analysis of Project MinE datafreeze 1 and 2<sup>7</sup>, which  
98 consisted of 5,185 ALS patients and 2,262 age- and sex-matched controls, reproduced the initial signal (P-value =  
99  $7.6 \times 10^{-4}$ ).

100 Together, IL18RAP 3'UTR sequence variants are associated with a lower risk of suffering from ALS, which is  
101 approximately one-fifth of the general population, although it did not reach conventional exome-wide multiplicity-  
102 adjusted significance threshold ( $\alpha \approx 2.6 \times 10^{-6}$ , ref. <sup>12</sup>) in our study.

103 To investigate the source of the signal in the IL18RAP 3'UTR in a posthoc analysis, we divided the 11 variant  
104 nucleotides into two synthetic sets, of either nine singleton variants (9 variants / 3 controls / 6 patients) or two  
105 variants that were identified solely in controls (2 variants / 9 controls / 0 patients). While the signal of the nine  
106 singleton variants was not statistically significant, analysis of the two control variants, which were identified in  
107 multiple samples, derived an improved significance compared to the original signal (SKAT-O P-value =  $4.36 \times 10^{-6}$ ).  
108 Thus, these two rare variants (V1, Chr2:103068691 C>T; V3, Chr2:103068718 G>A) are likely central in generating  
109 the genetic association signal in IL18RAP 3'UTR.

110 Because of the enrichment of V1 and V3 at the proximal (5') side of the IL18RAP 3'UTR, we tested if restricting  
111 burden analysis to the 5' end of the 3'UTR, might boost the association signal. However, the P-values gained from  
112 the 3'UTRs proximal quadrant were comparable to that of the full 3'UTRs in the cohort of 295 3'UTRs (Wilcoxon  
113 matched-pairs P-value  $> 0.05$ , Cohen's d effect size = 0.1, [Supplementary Fig. 4A,B](#)), suggesting that the apparent  
114 spatial distribution of variants in the case of IL18RAP 3'UTR is a particular case rather than part of a global pattern.

115 To determine the functional impact of the IL18RAP 3'UTR variants we analyzed IL18RAP expression in  
116 lymphoblastoid cell lines (LCLs) from the UK MNDA DNA Bank <sup>65</sup> that were derived from twelve different  
117 individuals: 4 healthy individuals (without ALS), carrying the canonical IL18RAP 3'UTR sequence (Control;  
118 Canonical IL18RAP 3'UTR); 4 sporadic ALS patients, carrying the canonical IL18RAP 3'UTR sequence (sALS;  
119 Canonical IL18RAP 3'UTR); two healthy individuals, carrying a variant form of IL18RAP 3'UTR (Control;  
120 VariantIL18RAP 3'UTR) and two sporadic ALS patients carrying a variant form of IL18RAP 3'UTR (sALS;  
121 VariantIL18RAP 3'UTR; see [Supplementary Table 8](#) for list of variants).

122 ALS-derived LCLs carrying the canonical IL18RAP 3'UTR sequence expressed higher levels of IL18RAP ([Fig. 3A,B](#)).  
123 In addition, LCLs from both healthy and ALS individuals harboring the IL18RAP 3'UTR variant significantly down-  
124 regulated IL18RAP mRNA and protein expression ([Fig. 3A,B and Data File S1](#)). Phosphorylation of the nuclear factor  
125 kappa-light-chain-enhancer of activated B cells (p-NF- $\kappa$ B), an established intracellular effector downstream of IL-

126 18 signaling, was similarly higher in the ALS LCLs with canonical IL18RAP 3'UTR and also significantly reduced in  
127 control and ALS LCLs harboring IL18RAP variants (Fig. 3C,D and Data File S1). Consistent results were obtained  
128 with C9orf72 hexanucleotide expansion ALS LCLs (Supplementary Fig. 5 and Data File S2). Accordingly, variants of  
129 IL18RAP 3'UTR reduced NF- $\kappa$ B activity, relative to the canonical 3'UTR in an NF- $\kappa$ B reporter assay in U2OS cells  
130 (Supplementary Fig. 6). Therefore, variant forms of IL18RAP 3'UTR correlate with reduced expression of the  
131 endogenous IL18RAP and reduced NF- $\kappa$ B signaling.

132 To further establish the functional relevance of the IL18RAP 3'UTR variants, we edited the genome of human-  
133 induced pluripotent cells (iPSCs) donated by ALS patients with C9orf72 repeat expansion (<sup>66</sup> NINDS/Coriell Code:  
134 ND10689, ND12099, see Supplementary Table 8) to include two point mutations that recapitulate the most  
135 prevalent variants (Chr2:103068691 C>T (V1) and Chr2:103068718 G>A (V3)) in the IL18RAP 3'UTR sequence (Fig.  
136 4A). The resulting isogenic pair lines all carry C9orf72 repeat expansion and vary by only the presence of the  
137 canonical or a variant IL18RAP 3'UTR.

138 We explored the receptive cell type involved in IL-18 receptor signaling by profiling dissociated mouse brain cells,  
139 namely, neurons, microglia, and astrocytes. Fluorescence cytometric gating on CD11b+ and CD45+ and IL18RAP  
140 (CD218b) revealed that IL18RAP is mainly expressed on microglia cells (Supplementary Fig. 7A-C). Although IL-18  
141 and IL18RAP expression increases in ALS motor neurons (Supplementary Fig. 8A-C), our observations are  
142 consistent with the accepted notion that the role of IL-18 and other cytokines in disease heavily rests on a chronic  
143 inflammatory state established particularly by microglia <sup>67</sup>.

144 Therefore, we next differentiated the isogenic IL18RAP 3'UTR lines into human microglia following the protocol  
145 of Haenseler et al. <sup>68</sup> (Fig. 4A). iPSC-derived microglia differentiation was validated by immunofluorescence  
146 staining of the microglial-specific marker, TMEM119 (Supplementary Fig. 9). In differentiated human microglia,  
147 we detected a ~5-6 fold downregulation in the levels of the variant IL18RAP protein, as well as in the levels of the  
148 IL18RAP mRNA, relative to the canonical sequence of the isogenic line (Fig. 4B,C and Data File S3). Therefore, the  
149 variants at the 3'UTR regulate IL18RAP mRNA and protein expression and provide a conceivable explanation for  
150 the variant function in human C9-ALS microglia. Next, we investigated the molecular mechanism that controls the  
151 IL18RAP mRNA levels by performing an mRNA stability assay in human microglia. We measured an mRNA  
152 degradation rate that is twice as fast with the rare 3'UTR variants, relative to the canonical sequence, after  
153 inhibition of mRNA transcription by actinomycin D (Fig. 4D). Thus, the mechanism for reduced IL18RAP mRNA  
154 levels is associated with destabilization of IL18RAP mRNA via variants in the 3'UTR.

155 We sought the potential trans-acting factors that might differentially bind to the canonical and variant 3'UTRs. To  
156 this end, we performed RNA-pulldown assays and mass spectrometry on *in vitro* transcribed canonical and variant  
157 forms of the IL18RAP 3'UTRs, V1 and V3 (Fig. 5A diagram of exp. design). Mass spectrometry after pull-down  
158 identified 552 proteins with good confidence (passed all QC filters, found in 50% of the repeats in at least one  
159 experimental group, and were represented by at least 2 unique peptides, Supplementary Table 9), that were  
160 enriched in comparison to the negative control. Principal component analysis demonstrated a clear separation of  
161 proteomes bound by the canonical and variant IL18RAP 3'UTRs (Fig. 5B and Supplementary Table 9). Gene set  
162 enrichment analysis (GSEA) revealed a reduction in the association of double-stranded RNA (dsRNA) binding  
163 proteins, to V1 IL18RAP 3'UTR, relative to the canonical 3'UTR (ELAVL1/Hur; PRKRA, EIF2AK2/PKR; ADAR; ADARB1;  
164 ILF2; ILF3; DHX9; DHX58; DDX58, Fig. 5C,D,E and Supplementary Table 10). These dsRNA binding proteins were  
165 reported in other contexts to play roles in controlling the stability of mRNA<sup>69-75</sup>, consistent with the observed  
166 changes to IL18RAP mRNA stability. A similar analysis of the V3 variant was unproductive (Supplementary Fig.  
167 10A).

168 In accordance, RNA Fold analysis predicted that the canonical 3'UTR sequence consists of a more stable dsRNA  
169 structure than the V1 variant sequence (minimum free energy (MFE) of canonical and variant IL18RAP 3'UTR, -  
170 39.9 kcal/mol and -27.8 kcal/mol, respectively) (Fig. 5F and Supplementary Fig. 10B). In light of these results, we  
171 propose that variant-dependent changes to the secondary structure of IL18RAP 3'UTR attenuate the binding of  
172 one or more of the dsRNA proteins and may be involved in controlling the stability of IL18RAP mRNA.

173 To study the potential protective impact of IL18RAP 3'UTR mutations, we performed survival analyses in a  
174 coculture system of human iPSC-derived isogenic IL18RAP 3'UTR microglia (on a *C9orf72 repeat expansion*  
175 *background*) with human iPSC-derived lower motor neurons (i<sup>3</sup>LMNs; healthy, non-ALS,<sup>76</sup>). Time-lapse microscopy  
176 was used to quantify motor neuron survival after microglia activation with a cocktail of LPS and the cytokine IL-18  
177 (experimental design, Fig. 6A). Motor neuron survival was significantly improved in the presence of microglia  
178 harboring the IL18RAP 3'UTR variants relative to microglia harboring the canonical IL18RAP 3'UTR (two  
179 independent isogenic pairs, based on independent patient C9orf72 lines, n=3 independent differentiation  
180 procedures from different passages per line, with 3-8 co-culture wells per passage; Fig. 6B-D, Supplementary  
181 movie and Data File S4). Based on these studies, we conclude that rare variants of IL18RAP 3'UTR increase *C9orf72*  
182 microglia-dependent motor neuron survival and hence convey a protective property.

183 To determine whether the mutant IL18RAP 3'UTR is also protective in human patients with ALS, we tested the  
184 association between age of diagnosis and age of death in ALS patients harboring canonical or variants of the  
185 IL18RAP 3'UTR. Of 4216 patients for whom data on the age of diagnosis was available (Project MinE and NYGC

186 cohorts), 8 harbored IL18RAP 3'UTR variants. Of 4263 patients for whom the age of death was available, 9  
187 harbored IL18RAP 3'UTR variants. IL18RAP 3'UTR variants are expected to be depleted in ALS genomes,  
188 nonetheless, in those extremely rare patients harboring IL18RAP 3'UTR variants, these were associated with an  
189 older age of death and an older age of diagnosis. On average, the age of death was higher by 6.1 years after the  
190 average for patients with canonical IL18RAP 3'UTR (Permutation P-value = 0.02, Cohen's d effect size = 0.65; [Fig.  
191 6E and Supplementary Table 11](#)), and the age of diagnosis was higher by 6.2 years after the average for patients  
192 with canonical IL18RAP 3'UTR (Permutation P-value = 0.05, Cohen's d effect size = 0.62; [Fig.6F and Supplementary  
193 Table 11](#)). Thus, variants in IL18RAP 3'UTR are protective against ALS in a tissue culture model and correlate with  
194 survival advantage for patients suffering from the disease.

195 To study the role of NF- $\kappa$ B signaling in our system, we analyzed NF- $\kappa$ B phosphorylation and the impact on the  
196 transcriptome after microglia activation ([Fig. 7A](#)). Western blot analysis revealed reduced levels of phospho-NF-  
197  $\kappa$ B in variant IL18RAP 3'UTR relative to isogenic control ([Fig. 7B and Data File S5](#)). Reduced phosphorylation is  
198 associated with decreased nuclear localization and transcriptional activity of NF- $\kappa$ B<sup>77-80</sup>. In parallel, we conducted  
199 a next-generation sequencing study ([Supplementary Table 12, Gene Expression Omnibus accession number:  
200 GSE186757](#)) of the differentially expressed transcriptomes in microglia harboring variant vs. canonical IL18RAP  
201 3'UTR. Over-representation analysis (ORA) of differentially expressed genes (DEGs) revealed downregulation of  
202 the NF- $\kappa$ B signaling pathway in microglia harboring the variant IL18RAP 3'UTR (KEGG Pathway enrichment results:  
203 Ratio = 3.77, FDR P-value =  $7.34 \times 10^{-6}$ ; Gene Ontology Biological Process enrichment results: Ratio = 3.48, FDR P-  
204 value =  $3.70 \times 10^{-12}$ , [Fig. 7C,D and Supplementary Table 13](#)). In addition, an unsupervised study of NF- $\kappa$ B pathway  
205 mRNAs (GO:0007249) demonstrated broad downregulation of pathway-associated mRNAs in microglia with the  
206 variant IL18RAP 3'UTR, relative to the isogenic control ([Fig. 7E](#)). Therefore, microglia's NF- $\kappa$ B transcriptomic  
207 signature depends on signaling via the IL-18 receptor and is attenuated by protective IL18RAP 3'UTR variants.

208 To test a plausible neurotoxic role for NF- $\kappa$ B downstream of the IL-18 receptor in this system, we next performed  
209 a co-culture survival assay with or without IKK16, a selective I $\kappa$ B kinase (IKK) inhibitor that inhibits NF- $\kappa$ B signaling  
210<sup>81</sup>. In human microglia with the canonical IL18RAP 3'UTR, IKK16 significantly ameliorated motor neuron toxicity,  
211 relative to control (carrier alone, [Fig. 7F](#)). However, in human microglia with the protective variant IL18RAP 3'UTR,  
212 inhibition of NF- $\kappa$ B had no effect (two independent isogenic pairs, based on independent patient C9orf72 lines  
213 with 3-8 co-culture wells per line, [Fig. 7F](#)). This suggests that NF- $\kappa$ B neurotoxic function resides epistatically  
214 downstream of IL18RAP in human microglia. Together, rare variants in IL18RAP 3'UTR diminish NF- $\kappa$ B signaling,  
215 thus increasing *C9orf72* microglia-dependent motor neuron survival.

216

## 217 Discussion

218 Data from the Project MinE and NYGC ALS consortia provide unprecedented opportunities for investigating the  
219 role of the non-coding genome in ALS. By performing rare variant aggregation analysis in regulatory non-coding  
220 regions, we demonstrate that variants in the 3'UTR of IL18RAP are enriched in non-ALS genomes, indicating that  
221 these are relatively depleted in ALS. IL18RAP 3'UTR variants reduced the chance of developing ALS five-fold, and  
222 delayed onset and therefore age of death in people with ALS.

223 These protective variants recall other protective variants that have been reported in the past in protein-coding  
224 regions in Alzheimer's disease <sup>82-85</sup> and implicated in ALS as well <sup>86, 87</sup>. In addition, deleterious variants were  
225 suggested in VEGF promoter/5'UTR and within CAV1/CAV2 enhancers <sup>11, 88</sup>. However, the 3'UTR of IL18RAP is a  
226 protective non-coding allele associated with a neurodegenerative disease.

227  
228 Elevated levels of the cytokine IL-18 were reported in tissues and biofluids of ALS patients <sup>36-38</sup>. Accordingly, we  
229 reveal the upregulation of endogenous IL18RAP in sporadic and C9orf72 lymphoblastoid cells. In addition, we  
230 demonstrate the downregulation of IL18RAP expression in lymphoblastoid cells harboring variant versions of the  
231 IL18RAP 3'UTR.

232  
233 We elucidated the regulatory changes affected by the IL18RAP 3'UTR variants by showing destabilization of the  
234 IL18RAP mRNA and downregulation of IL18RAP mRNA levels. Sequence analysis suggests that at least one variant  
235 (V1) potentially reduced the propensity of the 3'UTR to form a double-stranded secondary structure. Accordingly,  
236 unbiased proteomics demonstrated that the 3'UTR harboring the variant fails to bind dsRNA binding proteins that  
237 are known to stabilize mRNAs. Together, this supports a mechanism for reduced IL18RAP signaling involving  
238 changes to mRNA stability and differential binding of stabilizing RNA-binding proteins.

239  
240 Neuro-inflammation is prevalent in neurodegeneration, including in ALS <sup>89</sup>, and is often characterized by the  
241 activation of microglia <sup>29-35</sup>. The cytokine, IL-18, is part of this neuro-inflammatory milieu, promoting receptor  
242 subunit (IL18RAP, IL18R1) dimerization on the membrane of cells <sup>40</sup>, and activating intracellular signaling cascades,  
243 including NF- $\kappa$ B.

244  
245 By CRISPR editing of two independent C9orf72 lines, from one female and one male patient, we created isogenic  
246 IL18RAP 3'UTR cell lines (canonical or harboring V1 and V3 variants), at the endogenous gene locus. By  
247 differentiating these lines to human microglia, we demonstrated that variants downregulated IL18RAP mRNA and

248 protein expression. In addition, tracking of human (wild-type) motor neuron survival, in co-culture with microglia,  
249 over 21 days, demonstrated the neuroprotective effect of microglia carrying the variant IL18RAP 3'UTR.

250

251 Finally, we demonstrate that variant IL18RAP 3'UTR attenuates NF- $\kappa$ B signaling in lymphoblastoid cells and in  
252 microglia. Unbiased next-generation sequencing of microglia RNA demonstrated broad transcriptomic changes,  
253 typical of reduced NF- $\kappa$ B signaling. In addition, inhibition of NF- $\kappa$ B was able to ameliorate motor neuron death  
254 when co-cultured with microglia harboring the canonical IL18RAP 3'UTR. However, inhibition of NF- $\kappa$ B was not  
255 further protective if microglia with variant IL18RAP 3'UTR were present, suggesting an epistatic relationship,  
256 whereby IL18RAP is upstream of NF- $\kappa$ B in this system. We conclude that IL18RAP acts in microglia and controls  
257 the cytotoxicity conveyed to motor neurons, at least in human C9orf72 types of disease.

258

259 The discovery of functional, disease-modifying IL18RAP 3'UTR variants underscores the need to explore the role  
260 of additional non-coding genomic regions in ALS. One limitation of our study is that IL18RAP 3'UTR signal did not  
261 reach the conventional exome-wide multiplicity-adjusted significance threshold ( $\alpha \approx 2.6 \times 10^{-6}$ , ref. <sup>12</sup>). However,  
262 IL18RAP 3'UTR signal is comparable to that of protein-coding ALS-causing genes, such as *SOD1* and *NEK1*.  
263 Furthermore, the key findings were reproduced in a genome-wide study of all human 3'UTRs and in an  
264 independent replication study. Limitations in the statistical power might have prevented the discovery of other  
265 non-coding variants and may be overcome with larger ALS and control cohorts, which are not currently available.  
266 Additionally, we have focused our tissue culture studies on human C9orf72 microglia. Therefore, the involvement  
267 of IL18RAP 3'UTR in other ALS-associated genetic backgrounds remains to be experimentally explored, as is the  
268 relevance to other neurodegenerative diseases. Finally, the mechanism underlying IL18RAP dose sensitivity is not  
269 fully understood. While we provide evidence that variant IL18RAP 3'UTR endows neuroprotection via dampening  
270 of microglia-dependent neurotoxicity, additional studies should explore the degree to which other cell types, such  
271 as motor neurons and astroglia, are involved.

272

273 In summary, we have identified the IL18RAP 3'UTR as a non-coding genetic disease modifier by burden analysis of  
274 WGS data using ALS case-control cohorts. We show that IL-18 signaling modifies ALS susceptibility and  
275 progression, delineating a neuro-protective pathway and identifying potential therapeutic targets for ALS.  
276 Whereas the 3'UTR of IL18RAP is a protective non-coding allele associated with a neurodegenerative disease, the  
277 increasing wealth of WGS data in Project MinE, NYGC and elsewhere, indicates that the exploration of non-coding  
278 regulatory genomic regions should reveal further disease-relevant genetic mechanisms.

## 279 **Methods**

280

### 281 **Human genetic cohorts**

282 All participants contributed DNA after signing informed consent at the submitting sites. Human materials were  
283 studied under approval of the Weizmann Institute of Science Institutional Review Board (Weizmann IRB: 1039-1).

284 Discovery cohort: Project MinE ALS sequencing consortium Datafreeze 1 includes 3,955 ALS patients and 1,819  
285 age- and sex-matched controls, free of any neurodegenerative disease, for a total of 5,774 quality control (QC)  
286 passing whole-genomes, from the Netherlands, Belgium, Ireland, Spain, United Kingdom, United States, and  
287 Turkey. Rare variant association in cases versus controls was evaluated for regions of interest, when we could  
288 identify  $\geq 2$  variants per region, by SKAT-O, SKAT, CMC, and VT in RVTESTS environment<sup>90</sup>, with sex and the top 10  
289 principal components (PCs) as covariates. To construct the PCs of the population structure, an independent set of  
290  $\sim 450,000$  SNPs was sampled from WGS, (MAF  $\geq 0.5\%$ ) followed by LD-pruning. Rare genetic variants were included  
291 based on minor allele frequencies (MAF)  $\leq 0.01$  within the controls in the current data set.

292 Replication cohorts: Utilized for testing rare variant alleles (MAF  $< 0.01$ ) in human IL18RAP 3'UTR (GRCh37/hg19  
293 chr2:103068641-103069025 or GRCh38 chr2:102452181-102452565) from Project MinE datafreeze 2:  $\sim 1300$   
294 European heritage ALS genomes without middle eastern (Turkish and Israelis) genomes. The New York Genome  
295 Center (NYGC) ALS Consortium (2,184 ALS Spectrum MND and 263 non-neurological control genomes from  
296 European/Americas ancestries), NHLBI's Trans-Omics for Precision Medicine (TOPMed; 62,784 non-ALS genomes)  
297 and gnomAD (5,537 non-ALS genomes; Europeans, non-Finnish, non-TOPMed). Joint analysis in replication cohort  
298 was performed by Chi-square test with Yate's correction. Meta-analysis was not possible because TOPMed and  
299 gnomAD covariate information is not available.

### 300 **Quality control procedures in Project MinE genomics**

301 Sample selection, data merging, and sample- and variant level quality control procedures for Project MinE ALS  
302 sequencing consortium genomes are described in full previously<sup>63</sup>. Briefly, 6,579 Project MinE ALS sequencing  
303 consortium whole genomes were sequenced on Illumina HiSeq2000 or HiSeqX platforms. Reads were aligned to  
304 human genome build hg19 and sequence variants called with Isaac Genome Alignment Software and variant caller  
305<sup>91</sup>. Individual genomic variant call format files (GVCFs) were merged with 'agg' tool: a utility for  
306 aggregating Illumina-style GVCFs. Following completion of the raw data merge, multiple QC filtering steps were  
307 performed: (i) setting genotypes with GQ $< 10$  to missing; (ii) removing low-quality sites (QUAL $< 30$  and QUAL $< 20$

308 for SNPs and indels, respectively); (iii) removing sites with missingness > 10%. (iv) Samples excluded if deviated  
309 from mean by more than 6SD for total numbers of SNPs, singletons and indels, Ti/Tv ratio, het/hom-non-ref ratio,  
310 and inbreeding (by cohort). (v) missingness > 5%, (vi) genotyping-sequence concordance (made possible by  
311 genotyping data generated on the Illumina Omni 2.5M SNP array for all samples; 96% concordance), (vii) depth of  
312 coverage, (viii) a gender check (to identify mismatches), (ix) relatedness (drop samples with >100 relatedness  
313 pairs). (x) Related individuals were further excluded until no pair of samples had a kinship coefficient > 0.05. (xi)  
314 missing phenotype information. Following QC, 312 samples with expended/inconsistent *C9orf72* status were  
315 omitted from further analysis. A total of 5,774 samples (3,955 ALS patients and 1,819 healthy controls) passed all  
316 QC and were included in downstream analysis. Per-nucleotide site QC was performed on QC-passing samples only,  
317 for Biallelic sites: variants were excluded from analysis based on depth (total DP < 10,000 or > 226,000),  
318 missingness > 5%, passing rate in the whole dataset < 70%, sites out of Hardy–Weinberg equilibrium (HWE; by  
319 cohort, controls only,  $p < 1 \times 10^{-6}$ ) and sites with extreme differential missingness between cases and control  
320 samples (Overall and by cohort,  $p < 1 \times 10^{-6}$ ). Non-autosomal chromosomes and multiallelic variants were excluded  
321 from analysis.

## 322 **Selection of regions of interest**

323 Discontinuous regions of interest approximating in total ~5Mb, include coding sequences and 3' untranslated  
324 regions (3'UTRs) of 295 genes ([Supplementary Table 3](#)) encoding for proteins that were: (i) previously reported to  
325 be associated with ALS, (ii) RNA-binding proteins including miRNA biogenesis or activity factors [UCSC gene  
326 annotation; <sup>92</sup>]. In addition to (iii) all 1,750 autosomal human pre-miRNA genes [miRBase v20; <sup>57</sup>]. In addition,  
327 genome-wide analysis of all known human 3'UTRs (RefSeq <sup>64</sup>). Variants in regions of interest were extracted from  
328 Project MinE ALS sequencing consortium genomes using vcftools <sup>93</sup> according to BED file containing genomic  
329 coordinates of interest (hg19)  $\pm 300$  bp that ensures covering splice junctions and sequence ([Supplementary Table](#)  
330 [14](#)).



### 331 **Annotation and burden analysis**

332 After quality control and extraction of regions of interest, we performed functional annotation of all variants.  
333 Indels were left-aligned and normalized using bcftools and multiallelic sites were removed. For variant annotation  
334 we developed a pipeline that calculates the impact of genetic variation in coding regions as well as in 3'UTR and  
335 miRNA regions, using ANNOVAR<sup>94</sup>. The frequency of the variants in the general population was assessed by  
336 screening the 1000 Genomes Project, the Exome Aggregation Consortium (ExAC), and NHLBI Exome Sequencing  
337 Project (ESP). For protein-coding ORFs, association analysis of deleterious rare variants was performed, i.e.,  
338 frameshift variants, deviation from canonical splice variant, stop gain/loss variants, or a non-synonymous  
339 substitution, as predicted by at least three prediction programs (SIFT, Polyphen2 HVAR, LRT, MutationTaster,  
340 MutationAssessor, FATHMM, MetaLR) in dbNSFP environment [v2.0;<sup>58</sup>].

341 Non-coding sequence burden analysis included (i) 3'UTRs, (ii) variants in miRNA recognition elements (MREs) in  
342 3'UTRs ([Supplementary Table 3](#)): Variants that impaired conserved-miRNA binding sites in 3'UTRs (predicted loss  
343 of function) were called by TargetScan [v7.0;<sup>95</sup>]. Newly created miRNA binding sites in 3'UTRs (predicted gain of  
344 function) were called by textual comparison of all possible mutated seeds around a variant to all known miRNA  
345 seed sequences in the genome, (iii) all human pre-miRNAs (mirBase v20<sup>57</sup>) and (iv) miRNAs:target gene networks:  
346 mature miRNA sequences (mirBase v20<sup>57</sup>) and cognate targets within the 3'UTRs ([Supplementary Table 3](#)). Variant  
347 annotation scripts are available at GitHub: <https://github.com/TsviyaOlender/Non-coding-Variants-in-ALS-genes->

### 348 **Mammalian Cell Cultures**

349 Lymphoblastoid cell lines (LCLs) from the UK MND/ALS DNA Bank<sup>65</sup> were originally derived from sixteen different  
350 individuals: 4 healthy individuals (without ALS), carrying the canonical IL18RAP 3'UTR sequence (Control;  
351 Canonical IL18RAP 3'UTR); 4 sporadic ALS patients, carrying the canonical IL18RAP 3'UTR sequence (sALS;  
352 Canonical IL18RAP 3'UTR); two healthy individuals, carrying a variant form of IL18RAP 3'UTR (Control; Variant  
353 IL18RAP 3'UTR); two sporadic ALS patients carrying a variant form of IL18RAP 3'UTR (sALS; Variant IL18RAP 3'UTR)  
354 and 4 C9orf72 ALS patients, carrying the canonical IL18RAP 3'UTR sequence (C9orf72; Canonical IL18RAP 3'UTR)  
355 (Cell lines listed in [Supplementary Table 8](#); Weizmann IRB: 537-1). LCLs were cultured in RPMI-1640 (Gibco,  
356 21875091) with 20% inactivated fetal bovine serum (FBS, Biological Industries, 04-001-1A), 1% L-glutamine and  
357 1% penicillin-streptomycin (Biological Industries, 03-0311B) at 37°C, 5% CO<sub>2</sub>. Human Bone Osteosarcoma  
358 Epithelial Cells (U2OS), were maintained in Dulbecco's Modified Eagle Medium (DMEM, Biological Industries, 01-  
359 050-1A) supplemented with 10% FBS, 1% penicillin-streptomycin at 37°C, 5% CO<sub>2</sub>. Human iPSCs were cultured on  
360 Matrigel (Corning, 354277) coated plated in mTeSR1 medium (Stemcell technologies, 85850) according to the

361 manufacturer's instructions. Briefly, cells were passaged at 70–90% confluent with StemPro accutase (Gibco,  
362 A11105-01) and seeded in mTeSR1 medium supplemented with 10 nM Y-27632 dihydrochloride (Tocris, 1254).  
363 Cells were refreshed with mTeSR1 medium every 24 hours until passaged.

#### 364 **Isolation and Culture of Rat Cortical Astrocytes**

365 All experiments were performed in accordance with relevant guidelines and regulations of the Institutional Animal  
366 Care and Use Committee at Weizmann Institute of Science (IACUC 09491120-1). Primary cortical astrocytes were  
367 isolated and cultured as previously described<sup>96</sup> with several modifications. Briefly, the cerebral cortex of postnatal  
368 day 1 (P1) Sprague-Dawley rat pups was dissected and placed in DMEM/F12 containing 0.5% trypsin (biological  
369 industries, 03-046-5B). After 30 min incubation at 37 °C water bath, the cortical tissues were mechanically  
370 dissociated with pipette into single cells and were seeded on poly-D-lysine (Sigma Aldrich, 7405) coated T75  
371 culture flask in Astrocytes medium (DMEM/F12 (Gibco, 31330) supplemented with 10% FBS, 50U/mL Pen-strep  
372 and 2Mm Glutamax (Gibco, 35050-038)). The confluent cultures were shaken for 4 hours at 200 rpm to remove  
373 microglial cells. Each T75 flask was trypsinized and split into three new T75 flasks. After 7-8 days the confluent  
374 flasks were trypsinized and were frozen (in 90% FBS, 10% DMSO) until further use.

#### 375 **i<sup>3</sup>LMNs neuronal differentiation and *Syn::GFP*+ transduction**

376 Differentiation of hiPSCs into lower motor neurons (i<sup>3</sup>LMNs, iPSCs containing Doxycycline induced human NGN2,  
377 ISL1, and LHX3 (hNIL)) was performed as described previously<sup>76</sup>. Briefly, iPSCs were seeded on day 0 into mTeSR1  
378 medium supplemented with 10 nM Y-27632 dihydrochloride. Few hours after seeding, cells were transduced with  
379 *Syn::GFP* lentivirus (pHR-hSyn-EGFP, Addgene #114215). 24 hrs. after seeding the cells medium was replaced with  
380 differentiation medium (DMEM/F12 (Gibco, 31330-038) with 1× MEM non-essential amino acids (Gibco, 11140-  
381 035), 2mM GlutaMAX (Gibco, 35050-038), 1× N-2 supplement (Gibco, 17502-048), 2 µg/mL Doxycycline (Sigma  
382 Aldrich, D9891-1G.) and 10 nM Y-27632 dihydrochloride). On day 3, cells were split using accutase, counted and  
383 re-seeded on poly-D-Lysine coated dishes containing Rat astrocytes in neuronal medium (B27 Electrophysiology  
384 medium (Gibco, A14137-01) supplemented with 1× MEM non-essential amino acids, 2mM GlutaMAX, 1× N-2  
385 supplement, and 1 µg/mL mouse laminin (Gibco, 23017-015)). Twice a week half of the media was removed, and  
386 an equal volume of fresh media was added.

387

388

### 389 **Generation of IL18RAP 3'UTR rare variant hiPSCs lines**

390 iPSCs were generated by the Ichida lab from human lymphocytes from ALS patients obtained from the National  
391 Institute of Neurological Disorders and Stroke (NINDS) Biorepository at the Coriell Institute for Medical Research.  
392 Lymphocytes were reprogrammed into iPSCs as previously described <sup>66</sup>. The NINDS Biorepository requires  
393 informed consent from patients.

394 Human iPSC lines were maintained on irradiated MEFs in hESCs medium [DMEM/F12 (Sigma-Aldrich, D6421)  
395 supplemented with 20% KO Serum Replacement (Gibco, 10828-028,), 1% GlutaMax (Gibco, 35050038), 1% MEM-  
396 NEAA (Biological Industries, 01-040-1A), 0.1mM 2-Mercaptoethanol (31350-010, Gibco), 10ng/ml hFGF  
397 (PeproTech, 100-18B)] and passaged twice a week with Collagenase IV (Worthington, LS004188).

398 CRISPR guides were chosen using several design tools, including: the MIT CRISPR design tool <sup>97</sup> and sgRNA  
399 Designer, Rule set 2 <sup>98</sup>, in the Benchling implementations ([www.benchling.com](http://www.benchling.com)), SSC <sup>99</sup>, and sgRNAscorer <sup>100</sup>, in  
400 their websites.

401 Prior to CRISPR procedure iPSCs were passaged once in feeder-free condition [LDEV Free GelTrex matrix (Gibco,  
402 A1413202), mTESR1 medium (StemCell Technologies, 85850)], dislodged as single cells using StemPro Accutase  
403 (Gibco, A11105-01), washed twice with Opti-MEM (Gibco, 31985-047) and counted. 90ul cells suspension  
404 containing 1M cells was mixed with 10 uL DNA mix: 4 ug pSpCas9(BB)-2A-Puro (PX459) plasmid (Addgene #48139),  
405 0.4 ug gRNA encoding plasmid (pKLV-U6gRNA(BbsI)-PGKzeo2ABFP, derived from pKLV-U6gRNA(BbsI)-  
406 PGKpuro2ABFP (Addgene)), 1 ug (8 pmol) ssODN repair template ([Supplementary Table 15](#)) (IDT, 400 bases  
407 Megamer DNA Oligonucleotide) and 2.6 ug carrier plasmid DNA. CRISPR reaction components were introduced to  
408 iPSCs by single round electroporation using Nepa21 system (NEPA GENE). 100 uL cells and DNA suspension was  
409 transferred to Nepa Electroporation Cuvette 2 mm gap (Nepa Gene, EC-002). Electroporation conditions: 150 V  
410 Poring pulse; 5 ms Pulse length; 20 V Transfer pulse; 50 ms Pulse length. Electroporated cells were transferred to  
411 two GelTrex coated 100 mm dishes (1K and 10K) in mTeSR medium supplemented with 10 uM ROCK inhibitor  
412 (PeproTech, 1293823) and placed into CO2 incubator for 2 days. 48h past electroporation cells were treated with  
413 0.5 ug/mL Puromycin (Sigma-Aldrich) for 2 consecutive days. Survived cells were maintained until clones  
414 development. Single clones were picked and transferred to 96 well plates. Matured clones were genotyped at the  
415 first passage. Additionally, the top five predicted off-target sites for the guide RNA were sequenced  
416 ([Supplementary Table 16](#)). Selected clones containing desired mutations were expanded, cryopreserved, and used  
417 for the downstream experiments.

## 418 **Differentiation and culturing of human iPSC-derived microglia**

419 hiPSCs were differentiated to microglia-like cells as previously described<sup>68</sup>. Briefly, to form embryoid bodies (EBs),  
420 iPSCs were seeded into 96 well suspension plates in mTeSR1 media supplemented with 50 ng/mL rhBMP4  
421 (Peprotech, 314-BP), 50 ng/mL VEGF (Peprotech, 100-20), 20 ng/mL SCF (Peprotech, 300-07) and 10 nM Y-27632  
422 dihydrochloride. Everyday half of the medium was removed, and an equal volume of fresh media was added. After  
423 four days 12 EBs were transferred into each well of 6 well plate in X-VIVO 15 (Lonza, BE02-060Q) containing 100  
424 ng/mL M-CSF (Peprotech, 300-25), 25 ng/mL IL-3 (Peprotech, 200-03), 2 mM Glutamax, 55  $\mu$ M 2-mercaptoethanol  
425 (Gibco, 31350-10) and 100 U/mL penicillin/streptomycin (Biological Industries, 03-031-1B). iPSC derived  
426 progenitor microglia (ipMG) were collected weekly from the supernatant and were co-cultured with iPSC derived  
427 neurons in 96 well plates (Greiner, 655090) in neuronal medium containing 10 ng/mL IL-34 (Peprotech,200-34).  
428 EB medium was refreshed weekly.

## 429 **i<sup>3</sup>LMNs survival assay**

430 Survival assay was conducted by monitoring eGFP signal of day 5 i<sup>3</sup>LMNs co-cultured with two independent  
431 CRISPR-edited isogenic iPSC-derived microglia (harboring canonical or variant IL18RAP 3'UTR), with C9orf72  
432 genetic background. Cells were monitored for over 20 days using Incucyte<sup>®</sup> Live-Cell Analysis System (Sartorius).  
433 Daily longitudinal microscopic tracking was performed following Lipopolysaccharide (LPS, 100 ng/mL) and IL-18  
434 treatment (100 ng/mL). i<sup>3</sup>LMNs survival assay was performed using three individual replicates for each line, with  
435 3-8 co-culture wells per condition. Twice a week half of the media was removed, and an equal volume of fresh  
436 media containing LPS and IL-18 was added.

## 437 **Cloning**

438 Full IL18RAP coding sequence (CDS) and 3'UTR sequence (2223bp) in pMX vector was purchased from GeneArt  
439 (Invitrogen, [Supplementary Table 15](#)) and subcloned with V5 epitope into pcDNA3. Different mutants, including:  
440 WT IL18RAP CDS + mutant 3'UTR (V1 or V3), and a dominant-negative coding mutant E210A-Y212A-Y214A CDS +  
441 WT 3'UTR (3CDS)<sup>41</sup> created by Transfer-PCR mutagenesis<sup>101</sup>. Next, WT and mutants full IL18RAP were subcloned  
442 into pUltra vector (a gift from Malcolm Moore, Addgene plasmid #24130, for which mCherry was replaced with  
443 EGFP), downstream of the human Ubiquitin C promoter and EGFP-P2A. Cloning procedures were done via  
444 restriction-free cloning<sup>102</sup>. List of primers used for cloning and Transfer-PCR mutagenesis described in  
445 [Supplementary Table 16](#).

446

## 447 **Transfection**

448 Transfection to U2OS cells at 1.9 cm<sup>2</sup> corning plates was performed at 70–80% confluence, 24 hrs. post-plating in  
449 antibiotic-free media, using Lipofectamine 2000, 0.5 µL per well (Thermo Fisher Scientific, Cat# 11668027). Each  
450 well was considered as a single replicate. For NF-κB reporter assay, U2OS cells were induced with/without  
451 recombinant IL-18 (5 ng/mL) 72 hrs. post-transfection with full coding sequence of IL18RAP coding region + 3'UTRs  
452 (pUltra vector 500 ng / 1.9 cm<sup>2</sup> plate), luc2P/NF-κB-RE (pGL4.32 100 ng) luciferase and Renilla luciferase (hRluc 10  
453 ng). Following 6 hrs. cells were harvested for Dual-Luciferase<sup>®</sup> Reporter Assay (E1960) and luminescence was  
454 quantified using Veritas™ Microplate Luminometer.

## 455 **RNA extraction, cDNA synthesis, and quantitative real-time PCR.**

456 Total RNA from LCLs was extracted using Direct-Zol RNA MiniPrep (Zymo Research ,R2052) according to  
457 manufacturer instructions. Total RNA from ipMGs was extracted using miRNeasy micro Kit (QIAGEN, 217084)  
458 according to manufacturer instructions. Total RNA was reverse transcribed using High Capacity cDNA Reverse  
459 Transcription Kit (applied biosystem, 4368814) according to manufacturer instructions, except for the mRNA  
460 stability assay, where equal volume of RNA (and not equal amounts of RNA) from each sample was used to  
461 generate cDNA. Quantitative Real-time PCR was performed using TaqMan Universal PCR master Mix (applied  
462 biosystem, 4304437) or KAPA SYBR FAST (Roche, KK4605). Primers and TaqMan probes are shown in  
463 [Supplementary Table 16](#).

## 464 **Bulk MARS-Seq**

465 200,000 ipMGs harboring variant or canonical IL18RAP 3'UTR (n=4) were treated with 100 ng/mL LPS + 100 ng/mL  
466 IL-18 for 6 hrs. in ipMG media (Advanced DMEM (Gibco, 12491-015) containing 1× N-2 supplement (Gibco, 17502-  
467 048), 2mM GlutaMAX (Gibco, 35050-038), 55 µM 2-mercaptoethanol (Gibco, 31350-10), 50 U/mL  
468 penicillin/streptomycin (Biological Industries, 03-031-1B) and 100 ng/mL IL-34 (Peprotech, 200-34). Following 6  
469 hrs. RNA was extracted as described above and a bulk adaptation of the MARS-Seq protocol (Jaitin et al., Science  
470 2014; Keren-Shaul et al., Nature Protocols, 2019) was used to generate 3' RNA-Seq libraries for expression  
471 profiling. Briefly, 50 ng of input RNA from each sample was barcoded during reverse transcription and pooled.  
472 Following Agencourt Ampure XP beads cleanup (Beckman Coulter), the pooled samples underwent second strand  
473 synthesis and were linearly amplified by T7 in-vitro transcription. The resulting RNA was fragmented and  
474 converted into a sequencing-ready library by tagging the samples with Illumina sequences during ligation, RT, and  
475 PCR. Libraries were quantified by Qubit and TapeStation as well as by qPCR for GAPDH gene as previously

476 described (Jaitin et al., Science 2014; Keren-Shaul et al., Nature Protocols, 2019). Sequencing was done on a  
477 NovaSeq 6000 system, SP Reagent Kit, 100 cycles (Illumina; paired-end sequencing).

478 Analysis of the MARS-seq was done using the UTAP pipeline (<sup>103</sup>; the Weizmann Institute Bioinformatics Unit) to  
479 map the reads to the human genome and to calculate Unique Molecule Identifier (UMI) counts per gene. Reads  
480 were trimmed from their adapter using cutadapt (parameters: -a AGATCGGAAGAGCACACGTCTGAACTCCAGTCAC  
481 -a "A(10)" -times 2 -u 3 -u -3 -q 20 -m 25) and mapped to hg38 genome (STAR v2.4.2a). The pipeline removes UMI  
482 redundancy and quantifies the 3' of RefSeq annotated genes (1,000 bases upstream and 100 bases downstream  
483 of the 3' end). Genes having a minimum of five reads in at least one sample were considered for further analysis.  
484 Differentially expressed (DE) gene detection and count normalization analysis were performed by DESeq2. P-  
485 values in the UTAP results were adjusted for multiple testing using the Benjamini and Hochberg procedure.  
486 Thresholds for significant DE genes: padj < 0.01, |log2FoldChange| >= 0.585, baseMean > 20. This assay was done  
487 with critical advice from Dr. Hadas Keren-Shaul from the Genomics Sandbox unit at the Life Science Core Facility  
488 of Weizmann Institute of Science.

#### 489 **Cell lysis and Western blot**

490 LCLs were washed in PBSx1, centrifuged at 800 × g for 5 min at 4°C, pelleted, and lysed in ice-cold RIPA buffer  
491 (Supplementary Table 17) supplemented with cOmplete™ Protease Inhibitor Cocktail (Roche, 4693116001) and  
492 PhosSTOP™ (Roche, 4906837001). The lysates were cleared by centrifugation at 15,000 × g for 10 min at 4°C.  
493 Protein concentrations quantified with Protein Assay Dye Reagent (Bio-Rad, 500-0006), resolved at 30-50µg of  
494 total protein/well by 8-10% polyacrylamide / SDS gel electrophoresis at 100-120 V for 70 min. After gel  
495 electrophoresis proteins were transferred to nitrocellulose membrane (Whatmann, 10401383) at 250 mA for 70  
496 min. Membranes were stained with Ponceau (Sigma, P7170), blocked for 1 hour at RT with 3% Bovine albumin  
497 fraction V (MPBio 160069) or 5% milk protein in PBST (PBS containing 0.05% TWEEN-20), and then incubated with  
498 primary antibodies (see Supplementary Table 18) O.N. at 4°C with rocking in antibody-Solution [5% albumin, 0.02%  
499 sodium azide, 5 drops of phenol red in 0.05% PBST]. Following primary antibody incubation, membranes were  
500 washed 3 times for 5 min at RT with 0.05% PBST then incubated for 1 hour at RT with horseradish peroxidase  
501 (HRP)-conjugated species-specific secondary antibodies, washed 3 x 5 min in 0.05% PBST at RT, and visualized  
502 using EZ-ECL Chemiluminescence (Biological Industries, 20500-120) by ImageQuant™ LAS 4000 (GE Healthcare Life  
503 Sciences). Densitometric analysis was performed using ImageJ (NIH).

504

## 505 **In-Vitro Transcription of biotinylated IL18RAP 3'UTR**

506 To identify the potential trans-acting factors that might differentially bind to the canonical and variant 3'UTRs an  
507 RNA-pulldown and mass spectrometry assay was performed on *in vitro* transcribed canonical and variant forms  
508 of the IL18RAP 3'UTRs, V1 and V3. Briefly, The canonical, V1 and V3 biotinylated-IL18RAP 3'UTR sequences  
509 (384nt), and the negative control (ultrapure water only), were produced by using *in vitro* transcription HiScribe™  
510 T7 ARCA Kit (NEB, E2060S) following the manufacturer instructions. Briefly, 300 ng of purchased DNA template  
511 (50 ng/μL) (Twist, [Supplementary Table 15](#)) was incubated with unlabeled ATP/GTP/CTP and 5% biotin-labelled  
512 UTP, at 37°C for 3 hrs. Next, DNase treatment was performed by incubating the reactions at 37°C for 30 min and  
513 was followed by incubation at 65°C for 10 min to terminate the reaction. The RNA products were purified by an  
514 RNA cleanup purification kit (Zymo Research, R1015). The concentrations of the purified RNA samples were  
515 measured by nanodrop and the expected length was analyzed by TapeStation.

## 516 **Pull Down of IL18RAP 3'UTR RNA-associated proteins**

517 LCL cell pellets were suspended and lysed in RIPA buffer followed by centrifugation at 15,000xg for 10 min at 4°C.  
518 The concentrations of the cleared supernatants were measured by Bradford assay. 1 mg lysate per sample was  
519 incubated with Pierce streptavidin magnetic beads (Thermo Scientific, 88817) for 30 min at 4°C in rotation, to pre-  
520 clear the lysates from endogenous biotinylated-proteins. To bind IVT products (WT, V1, V3 and negative control;  
521 n=6 repeats/group) to the beads, new prepared binding Pierce streptavidin magnetic beads were incubated by  
522 rotation with equal amounts of IVT products for 30 min at 4°C (100 μL beads/10 pmol RNA product). After 30 min,  
523 the tubes of incubated IVT products with beads were washed three times, and then the cleared lysate was added  
524 equally to each tube and incubated for 30 min at 4°C. In the next step, the samples were washed three times by  
525 magnetizing the beads and resuspended by vortex with a high salt buffer. The bound beads were magnetized and  
526 suspended in 20 μl RNase-free PBSx1 for on-bead digestion procedure.

## 527 **Liquid Chromatography and Mass Spectrometry**

528 The resulting peptides were analyzed using nanoflow liquid chromatography (nanoAcquity) coupled to high  
529 resolution, high mass accuracy mass spectrometry (Q-Exactive HF). Each sample was analyzed on the instrument  
530 separately in a random order in discovery mode.

531

532

### 533 **Raw proteomic data processing**

534 Raw MS data were processed using MaxQuant version 1.6.6.0 (Cox and Mann, 2008). Database search was  
535 performed with the Andromeda search engine (Cox and Mann, 2011; Cox et al., 2011) using the human Uniprot  
536 database, appended with common lab protein contaminants. Forward/decoy approach was used to determine  
537 the false discovery rate and filter the data with a threshold of 1% false discovery rate (FDR) for both the peptide-  
538 spectrum matches and the protein levels. The label-free quantification (LFQ) algorithm in MaxQuant (Cox et al.,  
539 2014) was used to compare between experimental samples. Additional settings included the following  
540 modifications: Fixed modification- cysteine carbamidomethylation. Variable modifications- methionine oxidation,  
541 asparagine and glutamine deamidation, and protein N-terminal acetylation.

### 542 **Proteomics statistical analysis**

543 ProteinGroups output table was imported from MaxQuant to Perseus v.1.6.2.3 environment (Tyanova et al.,  
544 2016). Quality control excluded reverse proteins, proteins identified only based on a modified peptide, and  
545 contaminants. Non-specific streptavidin-bead binders were excluded by the following procedure: LFQ Intensity  
546 values were log<sub>2</sub> transformed, and two outlier samples were excluded from further analysis. Missing values were  
547 imputed by creating an artificial normal distribution with a downshift of 1.8 standard deviations and a width of  
548 0.4 of the original ratio distributions. Student's t-test with  $S_0 = 0.1$  was performed with FDR P-value  $\leq 0.05$   
549 between the experimental groups (Canonical, V1 and V3) and the negative control group, which was defined as a  
550 single control group. Proteins that passed all QC filters were separated for each of the experimental groups and  
551 compared to the negative control samples (ultrapure water). The statistically significant-associated proteins were  
552 filtered to retain only proteins that were found in 50% of the repeats in at least one experimental group and were  
553 represented by at least one unique peptide. The enriched proteins were subjected to student's t test between  
554 every two groups (canonical vs. V1 and canonical vs. V3), with  $S_0 = 0.1$ , FDR P-value  $\leq 0.05$  and fold-change  
555 threshold  $>2$ .

### 556 **Processing of Mouse Brain Samples for Flow Cytometry**

557 Wild-type C57BL/6 mice were euthanized with CO<sub>2</sub> and perfused with PBS through the left ventricle of the heart.  
558 Dissected mouse cortex was cut into smaller pieces using scissors and digested in 0.5 mg/mL Collagenase IV  
559 (Worthington Biochemical), 10  $\mu$ g Deoxyribonuclease (Sigma-Aldrich), 10% HI-FBS, RPMI1640 (Gibco) at 37°C for  
560 30 minutes with continuous agitation. Digested samples were gently triturated for 1 minute and the enzymatic  
561 reaction was stopped by adding 1 mM EDTA in PBS. The homogenate was filtered through a 100  $\mu$ m cell strainer  
562 and centrifuged at 400 x g for 8 minutes at 4°C to pellet the cells and myelin. This was followed by myelin removal



563 step by gradient centrifugation with 30% Percoll (Sigma-Aldrich) in PBS (700 x g for 20 minutes at 21oC; without  
564 brakes during deceleration). After myelin (the top white layer) separation, the middle transparent layer was  
565 collected, washed in PBS, and centrifuged at 400 x g for 8 minutes at 4°C to pellet the cells.

566 Cells pellets were incubated with Mouse Fc block (BD Biosciences 553142), Fixable Viability Stain 620 (BD  
567 Biosciences 564996) and the following antibody mixture in PBS at 4°C for 30 minutes: BV421 Rat Anti-CD11b (BD  
568 Biosciences 562605), BV510 Hamster Anti-Mouse TCR  $\beta$  Chain (BD Biosciences 563221), BV711 Rat Anti-Mouse  
569 Ly-6G (BD Biosciences 563979), APC-Cy7 Rat Anti-Mouse CD45 (BD Biosciences 557659), and Polyclonal Goat IgG  
570 Anti-Mouse IL-18R $\beta$  (R&D Systems AF199). Samples were then washed with PBS and incubated with Alexa Fluor  
571 647 Donkey Anti-Goat IgG (H+L) Cross-Adsorbed Secondary Antibody (Invitrogen A-21447) in PBS at 4°C for 30  
572 minutes. Surface-stained samples were washed with PBS and fixed and permeabilized with BD  
573 Fixation/Permeabilization solution (BD Biosciences 554714) at 4°C for 30 minutes, followed by intracellular  
574 staining with Alexa Fluor 488 Anti-NeuN Antibody (EMD Millipore MAB377X) and eFluor 570 Anti-GFAP  
575 (eBioscience 41-9892-82) in BD Perm/Wash Buffer (BD Biosciences 554714) at 4°C for 30 minutes. Cells were  
576 washed with BD Perm/Wash Buffer and resuspended in PBS for analysis with a FACSymphony (BD Biosciences).  
577 Data were collected as FCS files and analyzed with FlowJo v10 software (BD Biosciences). Antibody specificity was  
578 assessed using relevant isotype control antibodies and fluorescence minus one. Compensation was adjusted using  
579 single-stained samples.

580 The expression of IL-18RAP (IL-18R $\beta$ ) was expressed as Mean Fluorescence Intensity (MFI) or % frequency after  
581 gating for the following cell types: immune cells (CD45<sup>hi</sup>), microglia (MG: CD45<sup>int</sup> CD11<sup>hi</sup>), neurons (CD45<sup>-</sup> CD11b<sup>-</sup>  
582 NeuN<sup>+</sup>), and astrocytes (CD45<sup>-</sup> CD11b<sup>-</sup> GFAP<sup>+</sup>). Animal procedures were approved by the Walter and Eliza Hall  
583 Institute Animal Ethics Committee (Ethics application: 2020.017).

584

## 585 **Statistical analysis**

586 Statistics performed with Prism Origin (GraphPad). Shapiro-Wilk test was used to assess normality of the data.  
587 Pairwise comparisons passing normality test were analyzed with Student's *t*-test, whereas the Mann-Whitney test  
588 was used for pairwise comparison of nonparametric data. Multiple group comparisons were analyzed using  
589 ANOVA with post hoc tests. For age of diagnosis and age of death a Permutation Test was used (a Monte-Carlo  
590 simulation test on the *t*-test between ALS patients harboring canonical or variants of the IL18RAP 3'UTR).  
591 Statistical P-values <0.05 were considered significant. Data are shown as scatter dot plot with mean and SEM, box  
592 plots, or as noted in the text.

593 **Supplementary Materials**

594 Fig. S1. Study design.

595 Fig. S2. Region-based rare-variant association analyses.

596 Fig. S3. 3'UTR-based rare-variant association analysis, using different algorithms, and illustration of rare variants  
597 identified in the IL18RAP 3'UTR.

598 Fig. S4. Restricting burden analysis to the proximal part of 3'UTRs does not improve the association signal.

599 Fig. S5. IL18RAP and p-NF- $\kappa$ B expression is elevated in lymphoblastoid cells from patients with the C9orf72  
600 repeat expansion.

601 Fig. S6. IL18RAP 3'UTR variant attenuates IL-18 - NF- $\kappa$ B signaling in U2OS cells.

602 Fig. S7. IL18RAP is mainly expressed on mouse microglia cells.

603 Fig. S8. Evaluation of IL18RAP and IL-18 mRNA expression in motor neurons of patients with ALS.

604 Fig. S9. iPSC-derived microglia express the microglial-specific marker, TMEM119.

605 Fig. S10. Differentially bound RNA binding proteins to variant 3'UTR (V3) relative to canonical 3'UTR.

606 Table S1. Total number of samples before and after quality control procedures, stratified by country.

607 Table S2. Samples quality control procedures.

608 Table S3. Candidate genes list.

609 Table S4. Number of rare genetic variants identified.

610 Table S5. Detailed description of variants in protein-coding sequences of *NEK1* and *SOD1* and the IL18RAP 3'UTR,  
611 in Project MinE discovery cohort.

612 Table S6. Identified IL18RAP 3'UTR variants in Project MinE discovery cohort.

613 Table S7. Identified IL18RAP 3'UTR variants in discovery and replication cohorts.

614 Table S8. Control and patient human cell lines information.

615 Table S9. Proteomics data from IL18RAP 3'UTR pull-down experiments.

616 Table S10. Gene set enrichment analysis of differentially bound proteins in canonical vs. V1 IL18RAP 3'UTR.

617 Table S11. Phenotypic and variant information for patients with protective 3'UTR variants in Project MinE and  
618 NYGC cohorts.

- 619 Table S12. MARS-seq data for mRNAs measured in isogenic ipMG harboring variant vs. canonical IL18RAP 3'UTR.
- 620 Table S13. KEGG Pathway and Gene Ontology (GO) Biological Process Enrichment Results.
- 621 Table S14. BED file containing genomic coordinates of regions of interest.
- 622 Table S15. IL18RAP oligonucleotides.
- 623 Table S16. List of primers.
- 624 Table S17. Medium formulation.
- 625 Table S18. Materials and Antibodies.
- 626 Data File S1. Source data for IL18RAP and p-NF- $\kappa$ B western blot studies in LCLs (Figure 3D).
- 627 Data File S2. Source data for IL18RAP and p-NF- $\kappa$ B western blot studies in Control vs. C9orf72 LCLs (Supplementary  
628 figure 5D).
- 629 Data File S3. Source data for IL18RAP western blot studies in isogenic microglia (Figure 4B).
- 630 Data File S4. Source data for motor neuron survival assays (Figure 6B,C).
- 631 Data File S5. Source data for pNF- $\kappa$ B western blot studies in isogenic microglia, following microglia activation  
632 (Figure 7B).
- 633 Project MinE ALS Sequencing Consortium PI List
- 634 NYGC ALS Consortium PI List
- 635 Supplementary movie. Motor neuron survival was significantly improved in the presence of microglia harboring  
636 variant IL18RAP 3'UTR relative to canonical IL18RAP 3'UTR.

637 **Acknowledgments:**

638 We gratefully acknowledge the contributions of all participants and the investigators who provided biological  
639 samples and data for Project Mine ALS sequencing consortium, the New York Genome Center (NYGC) ALS  
640 Consortium, the Genome Aggregation Database (gnomAD) and Trans-Omics for Precision Medicine (TOPMed) of  
641 the National Heart, Lung, and Blood Institute (NHLBI, <https://www.nhlbiwgs.org/topmed-banner-authorship>). We  
642 thank Michael Ward (NINDS, NIH) for sharing human inducible i<sup>3</sup>LMN cells. Samples used in this research were in  
643 part obtained from the UK National DNA Bank for MND Research, funded by the MND Association and the  
644 Wellcome Trust. We acknowledge sample management undertaken by Biobanking Solutions funded by the  
645 Medical Research Council at the Centre for Integrated Genomic Medical Research, University of Manchester. The  
646 authors would like to thank the NINDS Biorepository at Coriell Institute for iPSC cell lines used in this study. We  
647 thank Bernardo Oldak and Prof. Jacob Hanna for microglia differentiation protocols, Dr. Noga Kozer and Dr. Haim  
648 Barr for assistance with live cell imaging, Dr. Alon Savidor and Dr. Yishai Levin for mass spectrometry, Dr. Merav  
649 Shmueli, Dr. Yifat Merbl and Dr. Ron Rotkof for advice and protocols. We thank LSE for language and scientific  
650 editing. Some illustrations were created with BioRender. Hornstein lab is supported by friends of Dr. Sydney  
651 Brenner. EH is Head of Andi and Larry Wolfe Center for Research on Neuroimmunology and Neuromodulation and  
652 incumbent of Ira & Gail Mondry Professorial chair. **Funding:** The work is funded by Legacy Heritage Fund, Bruno  
653 and Ilse Frick Foundation for Research on ALS, Teva Pharmaceutical Industries Ltd as part of the Israeli National  
654 Network of Excellence in Neuroscience (NNE) and Minna-James-Heineman Stiftung through Minerva, the  
655 European Research Council under the European Union's Seventh Framework Programme (FP7/2007-2013) / ERC  
656 grant agreement n° 617351. Israel Science Foundation, the ALS-Therapy Alliance, AFM Telethon (20576 to E.H.),  
657 Motor Neuron Disease Association (UK), The Thierry Latran Foundation for ALS research, ERA-Net for Research  
658 Programmes on Rare Diseases (FP7), A. Alfred Taubman through IsrALS, Yeda-Sela, Yeda-CEO, Israel Ministry of  
659 Trade and Industry, Y. Leon Benoziyo Institute for Molecular Medicine, Kekst Family Institute for Medical Genetics,  
660 David and Fela Shapell Family Center for Genetic Disorders Research, Crown Human Genome Center, Nathan,  
661 Shirley, Philip and Charlene Vener New Scientist Fund, Julius and Ray Charlestein Foundation, Fraida Foundation,  
662 Wolfson Family Charitable Trust, Adelis Foundation, MERCK (UK), Maria Halphen, Estates of Fannie Sherr, Lola  
663 Asseof, Lilly Fulop, Andi and Larry Wolfe Center for Research on Neuroimmunology and Neuromodulation and  
664 Benoziyo center for Neurological diseases. Weizmann - Brazil Center for Research on Neurodegeneration at The  
665 Weizmann Institute of Science, Redhill Foundation – Sam and Jean Rothberg Charitable Trust, Edward and Janie  
666 Moravitz, the Israeli Council for Higher Education (CHE) via the Weizmann Data Science Research Center, a  
667 research grant from the Estate of Tully and Michele Plessner and M. Judith Ruth Institute for Preclinical Brain  
668 Research. To A.A.-C. from Neurodegenerative Disease Research (JPND), Medical Research Council

669 (MR/L501529/1; STRENGTH, MR/R024804/1; BRAIN-MEND), Economic and Social Research Council  
670 (ES/L008238/1; ALS-CarE)), MND Association. National Institute for Health Research (NIHR) Biomedical Research  
671 Centre at South London and Maudsley NHS Foundation Trust and King's College London. This project has received  
672 funding from the European Research Council (ERC) under the European Union's Horizon 2020 research and  
673 innovation programme (grant agreement n° 772376 - ESCORIAL. The collaboration project is co-funded by the PPP  
674 Allowance made available by Health~Holland, Top Sector Life Sciences & Health, to stimulate public-private  
675 partnerships. This study was supported by the ALS Foundation Netherlands. To P.V.D.: Project MinE Belgium was  
676 supported by a grant from IWT (n° 140935), the ALS Liga België, the National Lottery of Belgium and the KU Leuven  
677 Opening the Future Fund. P.V.D. holds a senior clinical investigatorship of FWO-Vlaanderen and is supported by  
678 E. von Behring Chair for Neuromuscular and Neurodegenerative Disorders, the ALS Liga België and the KU Leuven  
679 funds "Een Hart voor ALS", "Laeversfonds voor ALS Onderzoek" and the "Valéry Perrier Race against ALS Fund".  
680 Several authors of this publication are members of the European Reference Network for Rare Neuromuscular  
681 Diseases (ERN-NMD). To P.J.S: from the Medical Research Council, MND Association, NIHR Senior Investigator  
682 Award, National Institute for Health Research (NIHR) Sheffield Biomedical Research Centre, and NIHR Sheffield  
683 Clinical Research Facility. To P.M.A.: Knut and Alice Wallenberg Foundation, the Swedish Brain Foundation, the  
684 Swedish Science Council, the Ulla-Carin Lindquist Foundation. H.P.P. and sequencing activities at NYGC were  
685 supported by the ALS Association (ALSA) and The Tow Foundation. C.E. was supported by scholarship from Teva  
686 Pharmaceutical Industries Ltd as part of the Israeli National Network of Excellence in Neuroscience (NNE). S.M.K.F.  
687 is supported by the ALS Canada Tim E. Noël Postdoctoral Fellowship. R. H. Brown Jr. was funded by ALS  
688 Association, ALS Finding a Cure, Angel Fund, ALS-One, Cellucci Fund and NIH grants (R01 NS104022, R01 NS073873  
689 and NS111990-01 to R.H.B.J.). J.K.I. is a New York Stem Cell Foundation-Robertson Investigator. Work at J.K.I. lab  
690 was supported by NIH grants R01NS097850, U.S. Department of Defense grant W81XWH-19-PRARP-CSRA, and  
691 grants from the Tau Consortium, the New York Stem Cell Foundation, the ALS Association, and the John Douglas  
692 French Alzheimer's Foundation. To R.L.McL.: Science Foundation Ireland (17/CDA/4737). To A.N.B.: Suna and Inan  
693 Kirac Foundation. To J.E.L.: National Institute of Health/NINDS (R01 NS073873). **Author contributions:** C.E. and  
694 A.Si. led the project; C.E. and A.Si. contributed to research conception, design and interpretations and wrote the  
695 manuscript with E.H.; C.E., E.B., T.O., K.R.V.E., S.L.P., M.M., S.M.K.F., N.Y., J.C.-K., K.P.K., R.A.A.V.D.S., W.S., A.A.K.,  
696 A.I., A.Sh., A.R.J., E.C., D.R., O.W., R.H.B.J., P.J.S., P.V.D., L.H.v.d.B., H.P.P., E.S., A.A.-C. and J.H.V. collected samples,  
697 were involved in the sequence analysis pipeline, phenotyping, variant calling, provided expertise or were involved  
698 in the genetic association analysis of rare non-coding variants in human patients with ALS; S.-T.H. and J.K.I.  
699 provided stem cells and initial data; S.B.-D., E.A., G.B. and H.M.-K. were involved in the design, generation and  
700 validation of CRISPR-edited IL18RAP isogenic iPSCs; H.M.-K. and Y.M.D. performed the pull down experiments of

701 IL18RAP 3'UTR RNA-associated proteins and analyzed the proteomic data; A.Si. and C.E. established human iPSC-  
702 derived microglia differentiation and culturing protocols, performed motor neuron survival experiments and  
703 interpreted data; A.Si., N.R. and C.E. performed molecular biology studies in LCLs and U2OS cell lines, including  
704 reporter assays, qPCR and protein quantification by western blots; E.Y. performed Bulk MARS-Seq experiment; C.-  
705 H.Y., C.L. and S.L.M. provided expertise and processed mouse cortex samples for Flow Cytometry; Y.C., Y.E.-A.,  
706 S.W. and D.P.S. helped performing research; E.H. conceived and supervised the study and wrote the manuscript  
707 with C.E. and A.Si. All co-authors provided approval of the manuscript.

708 **Competing interests:** J.K.I. is a co-founder of AcuraStem Incorporated. J.K.I. declares that he is bound by  
709 confidentiality agreements that prevent him from disclosing details of his financial interests in this work. J.H.V.  
710 and L.H.v.d.B. report to have sponsored research agreements with Biogen. E.H. is inventor on pending patent  
711 family PCT/IL2016/050328 entitled "Methods of treating motor neuron diseases". All other authors declare that  
712 they have no competing interests. **Data availability:** Human genetics data is publically available from the  
713 sequencing consortia: Project Mine ALS sequencing consortium, the New York Genome Center (NYGC) ALS  
714 Consortium, the Genome Aggregation Database (gnomAD), and NHLBI's Trans-Omics for Precision Medicine  
715 (TOPMed). Gene Expression Omnibus accession number: GSE186757. All Other data used for this manuscript are  
716 available in the manuscript. **Code availability:** Variant annotation scripts are available at GitHub:  
717 <https://github.com/TsviyaOlender/Non-coding-Variants-in-ALS-genes->.

718 **FIGURES**

719

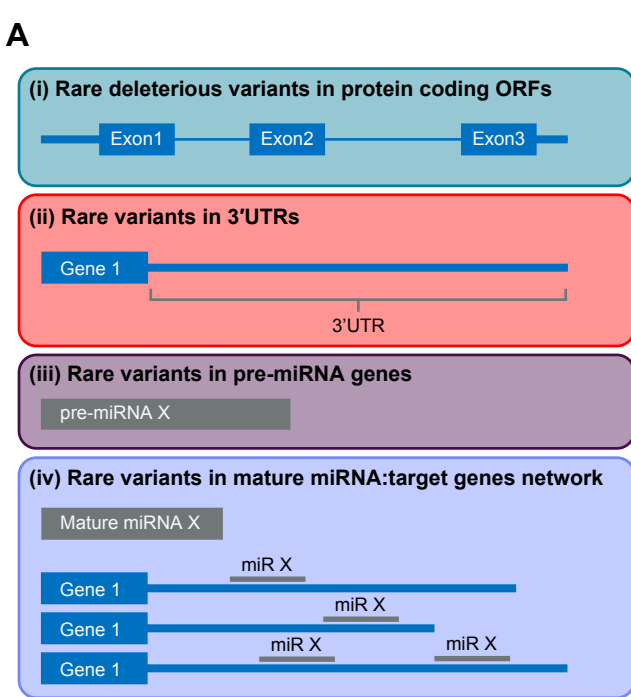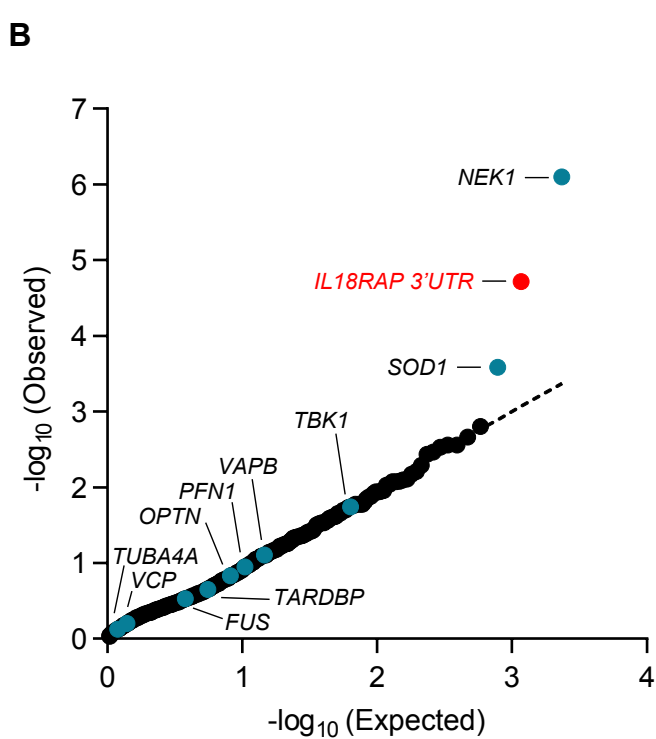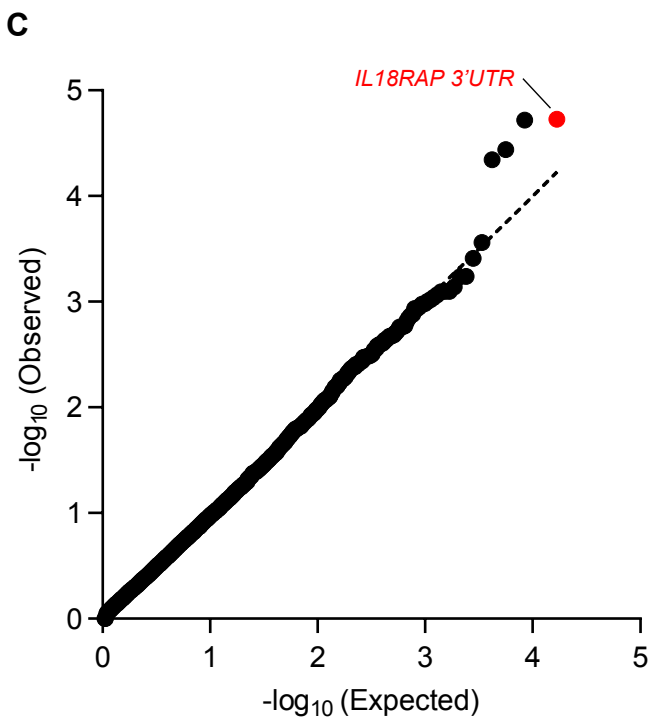

Fig.1 - Eitan et al. (Hornstein)



720 **Fig. 1. Region-based rare-variant association analysis reveals association of IL18RAP 3'UTR with ALS. (A)** Diagram  
721 of study design. Collapsed region-based rare-variant ( $MAF \leq 0.01$ ) association analysis was performed on: (i) 295  
722 candidate protein-coding genes ([Supplementary Table 3](#)), encoding for ALS-relevant proteins or proteins  
723 associated with miRNA biogenesis/activity. Variants were included if predicted to cause frameshifting, alternative  
724 splicing, an abnormal stop codon, or a deleterious non-synonymous amino acid substitution, in  $\geq 3$  of 7  
725 independent dbNSFP prediction algorithms; (ii) variants in 3'-untranslated regions (3'UTRs) of the 295 genes  
726 ([Supplementary Table 3](#)); (iii) all known autosomal pre-miRNA genes in the human genome; and (iv) predicted  
727 networks, comprised of aggregated variants detected in a specific mature miRNA sequence and its cognate down-  
728 stream 3'UTR targets. **(B)** QQ plot of obtained and expected P-values for the burden of rare variants (log scale),  
729 gained by collapsed region-based association analysis of all genomic regions described in (A). Data were obtained  
730 from 3,955 ALS cases and 1,819 controls (Project MinE). Features positioned on the diagonal line represent results  
731 obtained under the null hypothesis. Open-reading frames of 10 known ALS genes (blue). IL18RAP 3'UTR (red).  
732 Genomic inflation  $\lambda = 1.2$ . **(C)** QQ plot of obtained and expected P-values for the burden of rare variants (log scale),  
733 gained by collapsed region-based association analysis for all known human 3'UTRs (RefSeq). The IL18RAP 3'UTR  
734 (red) is the most significant 3'UTR associated with ALS. P-values, calculated with Optimized Sequence Kernel  
735 Association Test, SKAT-O (genomic inflation  $\lambda = 0.97$ ).

**A**

| Gene    | Region | ALS (3955) | Control (1819) | OR    | OR 95% CI   | P                     | P corrected           |
|---------|--------|------------|----------------|-------|-------------|-----------------------|-----------------------|
| NEK1    | Coding | 127        | 19             | 3.14  | 1.93-5.11   | $8.00 \times 10^{-7}$ | $2.30 \times 10^{-4}$ |
| SOD1    | Coding | 36         | 0              | 33.89 | 2.08-552.47 | $2.60 \times 10^{-4}$ | $3.73 \times 10^{-2}$ |
| IL18RAP | 3'UTR  | 6          | 12             | 0.23  | 0.09-0.61   | $1.93 \times 10^{-5}$ | $5.41 \times 10^{-3}$ |

**B**

| Cohort        | Cases  | Control | OR   | OR 95% CI   |
|---------------|--------|---------|------|-------------|
| Ireland       | 0/239  | 1/136   | 0.19 | 0.008-4.662 |
| Netherlands   | 2/1633 | 7/1004  | 0.17 | 0.036-0.842 |
| Turkey        | 0/142  | 1/67    | 0.16 | 0.006-3.870 |
| UnitedKingdom | 2/1043 | 2/272   | 0.26 | 0.036-1.850 |
| USA           | 2/398  | 1/68    | 0.34 | 0.030-3.784 |
| Belgium       | 0/295  | 0/172   | -    | -           |
| Spain         | 0/205  | 0/100   | -    | -           |
| Total         | 6/3955 | 12/1819 | 0.23 | 0.086-0.611 |

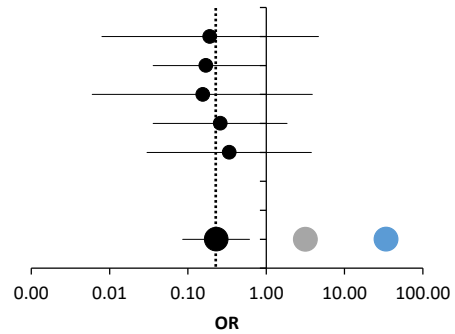

**C**

| Cohort                                            | Cases   | Control   | OR   | 95% CI      | P                       |                       |
|---------------------------------------------------|---------|-----------|------|-------------|-------------------------|-----------------------|
|                                                   |         |           |      |             | $\chi^2$                | SKAT-O                |
| <b>Discovery:</b><br>Project MinE                 | 6/3955  | 12/1819   | 0.23 | 0.086-0.611 | $3.00 \times 10^{-3}$   | $1.93 \times 10^{-5}$ |
| <b>Replication:</b><br>NYGC, TOPMed & gnomAD      | 8/2184  | 786/68584 | 0.32 | 0.158-0.637 | $9.58 \times 10^{-4}$   | -                     |
| <b>Joint analysis:</b><br>Discovery & replication | 14/6139 | 798/70403 | 0.20 | 0.118-0.338 | $< 1.00 \times 10^{-5}$ | -                     |

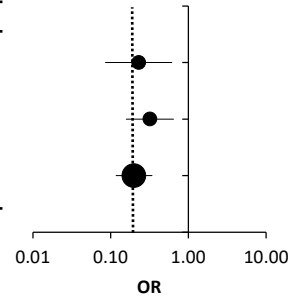

Fig.2 - Eitan et al. (Hornstein)

736 **Fig 2. Odds of ALS are reduced with rare variants in the IL18RAP 3'UTR. (A)** Odds ratio (OR) estimates with 95%  
737 confidence intervals (CI) for NEK1 (coding), SOD1 (coding) and IL18RAP (3'UTR). P-values corrected for false  
738 discovery rate (FDR). **(B)** Stratification of data pertaining to IL18RAP 3'UTR in seven geographically-based sporadic  
739 ALS sub-cohorts and forest plot (OR on log scale with whiskers for 95% CI). *NEK1* (grey) and *SOD1* (blue) signals  
740 are from combined data of all cohorts. Vertical dotted line denotes OR=0.23. **(C)** Stratification of IL18RAP 3'UTR  
741 variants data across discovery and replication cohorts and joint analysis thereof; Forest plot (OR on log scale with  
742 whiskers for 95% CI). Vertical dotted line denotes OR=0.2. P-values, calculated with SKAT-O or Chi-squared test  
743 with Yate's correction.

# Lymphoblastoid cell lines

**A**

## IL18RAP mRNA

- Control; Canonical IL18RAP 3'UTR
- Control; Variant IL18RAP 3'UTR
- sALS; Canonical IL18RAP 3'UTR
- sALS; Variant IL18RAP 3'UTR

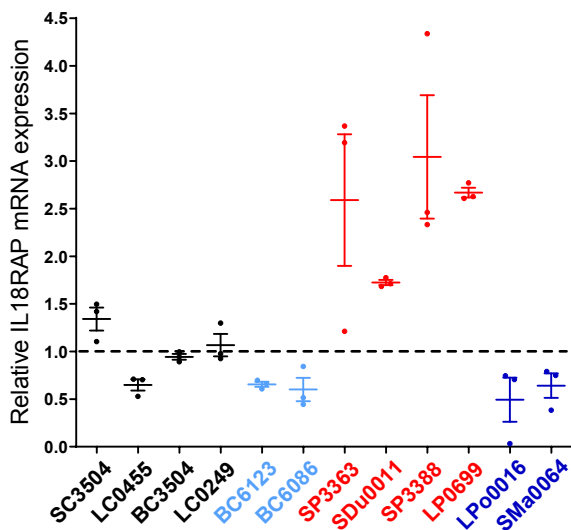

**B**

## IL18RAP protein

- Control; Canonical IL18RAP 3'UTR
- Control; Variant IL18RAP 3'UTR
- sALS; Canonical IL18RAP 3'UTR
- sALS; Variant IL18RAP 3'UTR

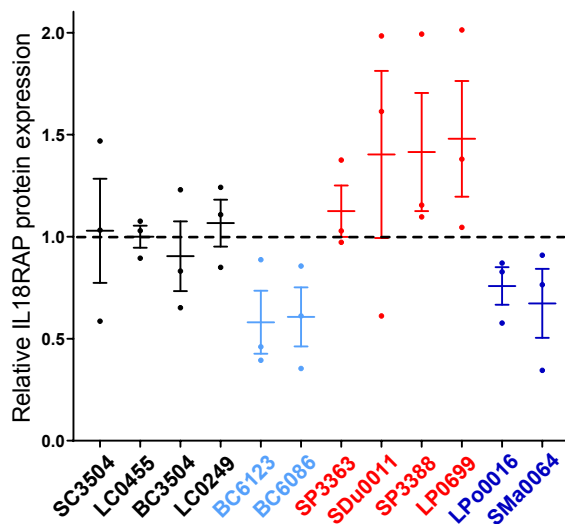

**C**

## pNF-κB protein

- Control; Canonical IL18RAP 3'UTR
- Control; Variant IL18RAP 3'UTR
- sALS; Canonical IL18RAP 3'UTR
- sALS; Variant IL18RAP 3'UTR

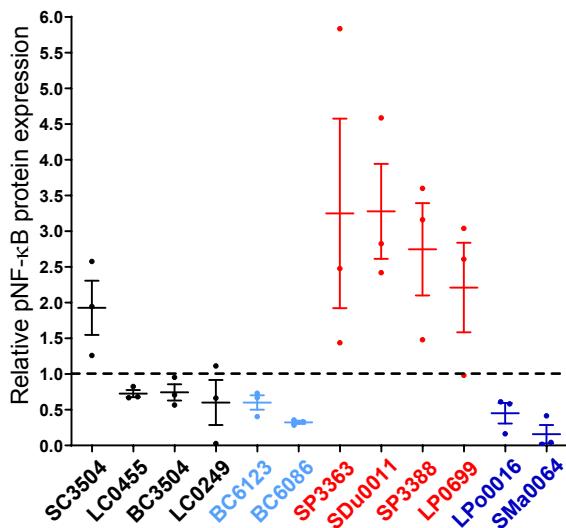

**D**

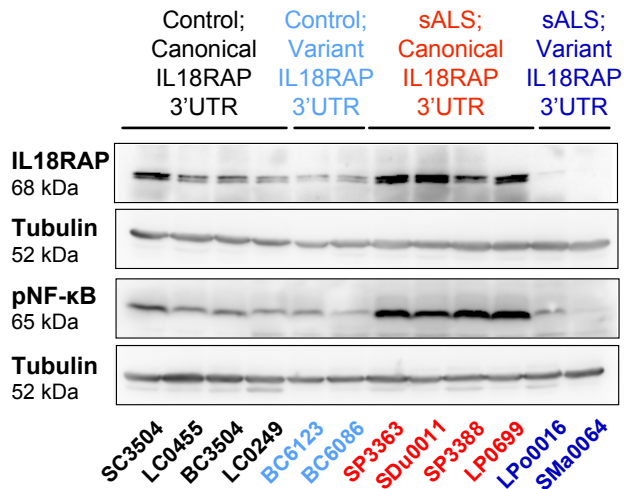

744 **Fig. 3. IL18RAP 3'UTR variant correlates with attenuated IL-18 - NF- $\kappa$ B signaling in human lymphoblastoid cells.**  
745 **(A)** IL18RAP mRNA expression (qPCR normalized to IPO8 mRNA levels) and **(B)** IL18RAP or **(C)** p-NF- $\kappa$ B protein  
746 expression (Western blots, normalized to Tubulin). Scatter dot plot with mean and SEM. **(D)** Representative blots  
747 processed with anti-IL18RAP, anti p-NF- $\kappa$ B and anti-Tubulin antibodies. Extracts from twelve different human  
748 lymphoblastoid cell lines (listed in Supplementary Table 8): Four lines of healthy individuals (without ALS), carrying  
749 the canonical IL18RAP 3'UTR sequence (Control; Canonical IL18RAP 3'UTR, black); Four sporadic ALS patients,  
750 carrying the canonical IL18RAP 3'UTR sequence (sALS; Canonical IL18RAP 3'UTR, red); Two healthy individuals,  
751 carrying a variant form of IL18RAP 3'UTR (Control; Variant IL18RAP 3'UTR, light blue) and two sporadic ALS  
752 patients carrying a variant form of IL18RAP 3'UTR (sALS; Variant IL18RAP 3'UTR, navy blue). One-way ANOVA  
753 followed by Newman-Keuls multiple comparisons test, was conducted based on the mean value of three  
754 independent passages for each of the twelve human lymphoblastoid cell lines. \* P<0.05; \*\* P<0.01; \*\*\* P<0.001.

755

756

757

758

759

760

761

762

763

764

765

766

767

**A****1 Genome editing of C9-ALS iPSCs**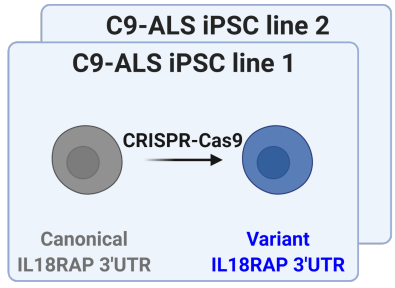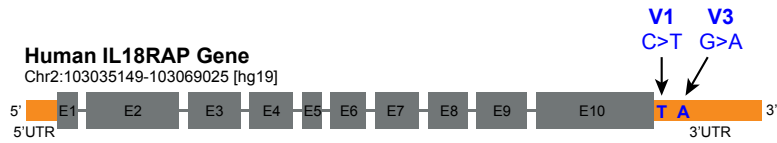**2 iPSC-derived microglia differentiation**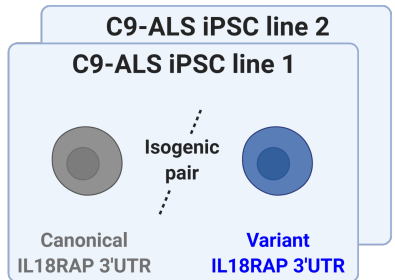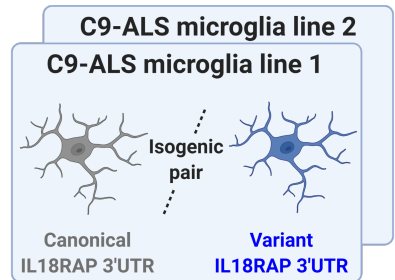**B**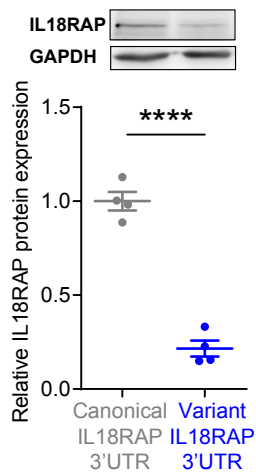**C**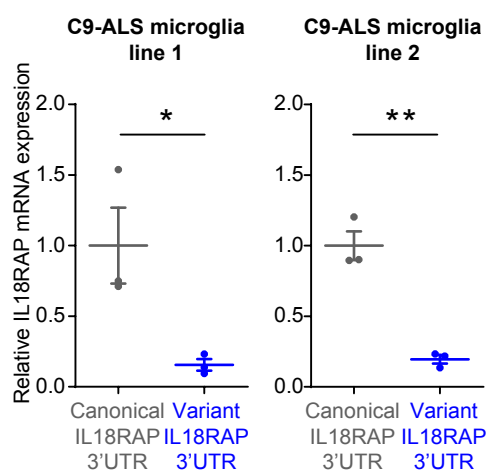**D**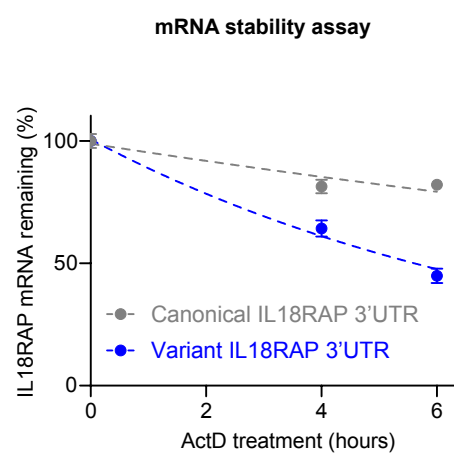

768 **Fig. 4. IL18RAP 3'UTR variant destabilizes IL18RAP mRNA in CRISPR-edited isogenic iPSC-derived microglia, with**  
769 **C9orf72 genetic background. (A)** Diagram of experimental design. (1) Genome editing with CRISPR Cas9 of point  
770 mutations that recapitulate the most prevalent variants (Chr2:103068691 C>T (V1) and Chr2:103068718 G>A (V3))  
771 in the IL18RAP 3'UTR sequence in human induced pluripotent stem cells (iPSCs) donated by ALS patients with a  
772 C9orf72 repeat expansion (<sup>66</sup> NINDS/Coriell Code: ND10689, ND12099, [Supplementary Table 8](#)). The two  
773 independent isogenic pairs of cell lines both carry the C9orf72 repeat expansion and vary only by the presence of  
774 the canonical or a variant IL18RAP 3'UTR. (2) The four IL18RAP 3'UTR lines (two isogenic pairs) were differentiated  
775 into human microglia <sup>68</sup>. Dot plots of IL18RAP **(B)** protein levels (by Western blot analysis, normalized to GAPDH,  
776 N=3, [Data File S3](#)) and **(C)** mRNA (by qPCR, normalized to IPO8 mRNA N=3) in differentiated human microglia. **(D)**  
777 IL18RAP mRNA degradation rate studied in human isogenic microglia at 0, 4 and 6 hrs after introduction of a  
778 transcriptional block with actinomycin D (7.5 µg/mL, Sigma-Aldrich A9415) (by qPCR, normalized to average of  
779 IPO8 and GAPDH mRNA expression, n = 4 independent wells per time point with two technical duplicates). Variant  
780 3'UTR destabilizes the IL18RAP mRNA relative to the canonical sequence. Scatter dot plot with mean and SEM.  
781 Two sided t-test P- values \* <0.05, \*\* <0.01, \*\*\*\* <0.0001.

782

783

784

785

786

787

788

789

790

791

792

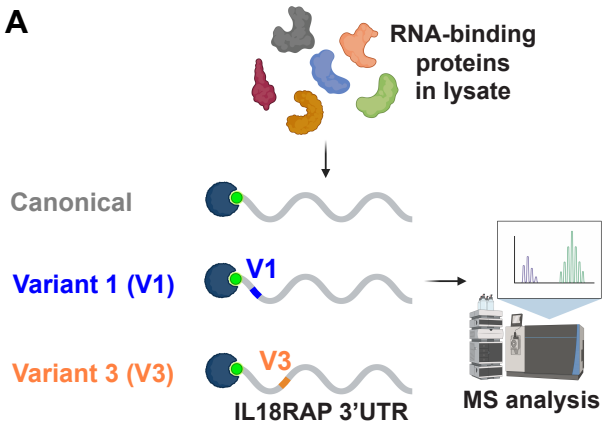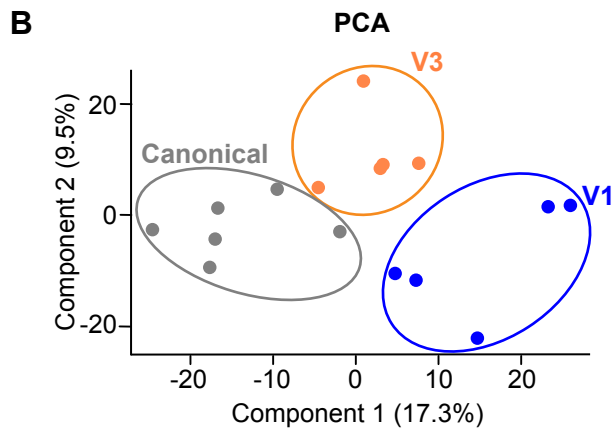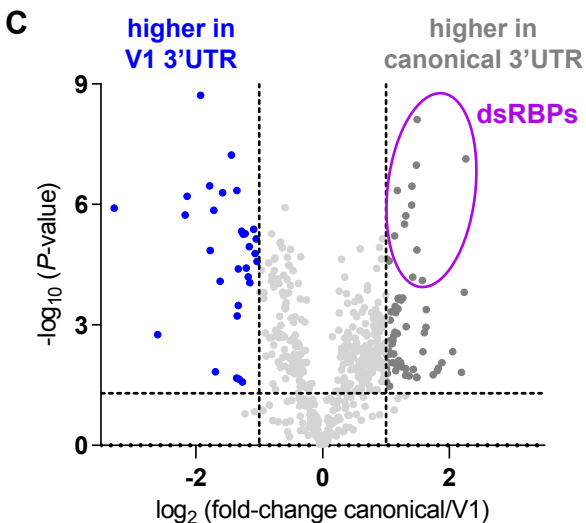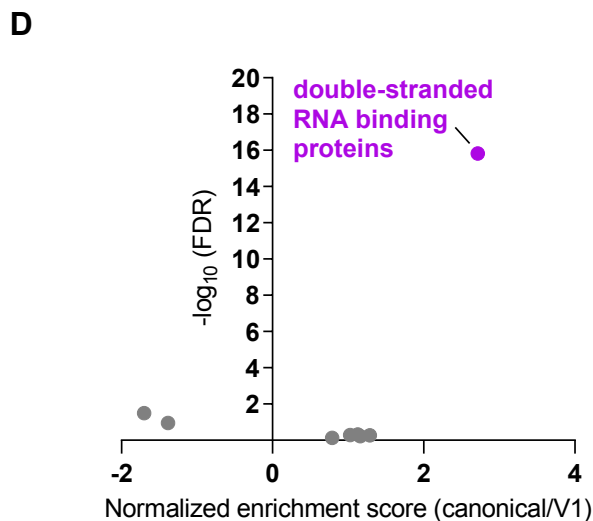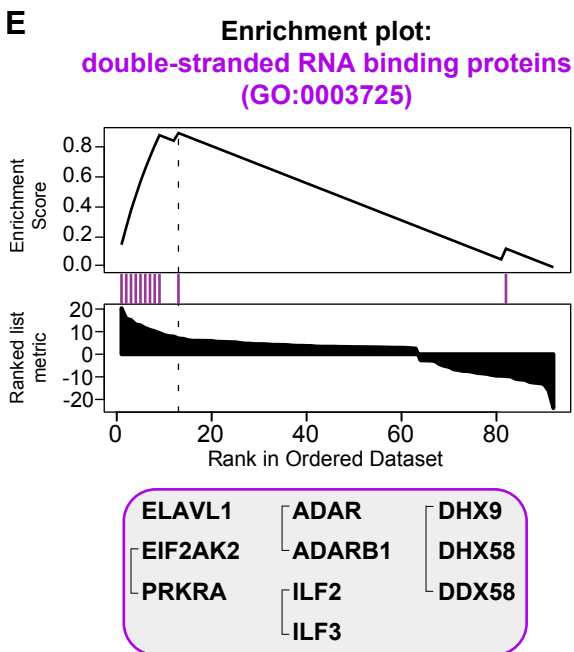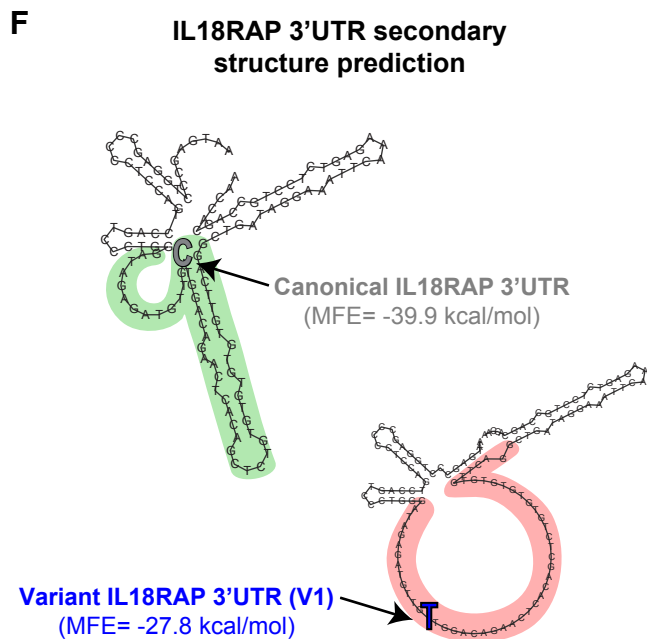



793 **Fig. 5. Reduced association of double-stranded RNA binding proteins to variant IL18RAP 3'UTR. (A)** Diagram of  
794 mass spectrometry of RNA binding proteins pulled-down by IL18RAP 3'UTR sequences (canonical, V1 and V3). **(B)**  
795 Principal-component analysis (PCA) of IL18RAP 3'UTR-associated proteomes pulled down by the canonical (grey,  
796 N=6 experimental repeats), V3 (orange, N=5), and V1 (blue, N=5) biotin-tagged, in-vitro transcribed oligos. **(C)**  
797 Volcano plot of protein abundance associated with the canonical relative to variant (V1) IL18RAP 3'UTR (x-axis  
798 log<sub>2</sub> scale), analyzed by MS. Y-axis depicts P-values (-log<sub>10</sub> scale). Proteins significantly enriched in association  
799 with canonical/variant 3'UTR are colored (grey/blue). Double-stranded RNA-binding proteins (dsRBPs) are  
800 demarcated by a purple oval. Features above the horizontal dashed line demarcate proteins with adjusted  $p <$   
801 0.05, in student's t-test with FDR correction to multiple hypotheses. Vertical dashed lines are of 2 or ½ fold change.  
802 A non-significant data point of KIF13B (P-value = 0.08) is not shown for clarity of the illustration ([Supplementary](#)  
803 [Table 9](#)) **(D)** Volcano plot of normalized enrichment score of the Gene Ontology (GO) molecular function gene sets  
804 from GSEA analysis of differentially expressed proteins (canonical vs. V1 IL18RAP 3'UTR). Reduced association of  
805 double-stranded RNA binding proteins (GO:0003725; purple) with V1 IL18RAP 3'UTR, relative to the canonical  
806 3'UTR. All gene sets are described in [Supplementary Table 10](#). **(E)** Profile of GSEA enrichment score and positions  
807 of the 10 double-stranded RNA binding proteins (purple) within all differentially expressed proteins, ranked from  
808 most enriched in canonical 3'UTR to most depleted protein ([Supplementary Table 10](#); WebGestalt<sup>104</sup>). **(F)**  
809 Prediction of 3'UTR secondary structure by RNA Fold<sup>105</sup> suggests a more stable dsRNA structure of canonical 3'UTR  
810 (green), with lower minimum free energy (MFE) than that of the sequence harboring a V1 variant (red).

811

812

813

814

815

816

817

818

819

# A Co-culture of isogenic IL18RAP 3'UTR C9-ALS microglia and WT i<sup>3</sup>LMNs

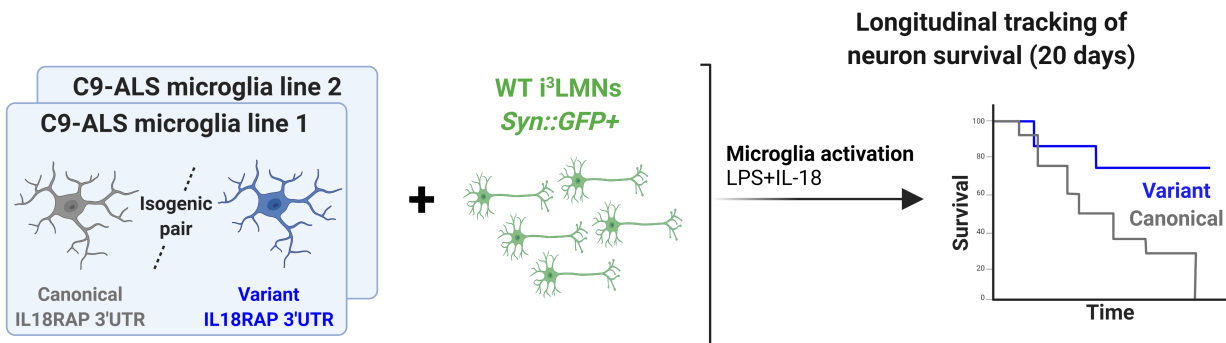

## B

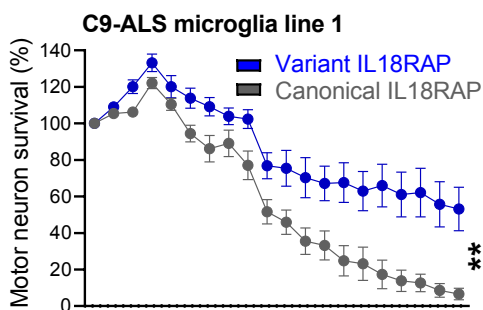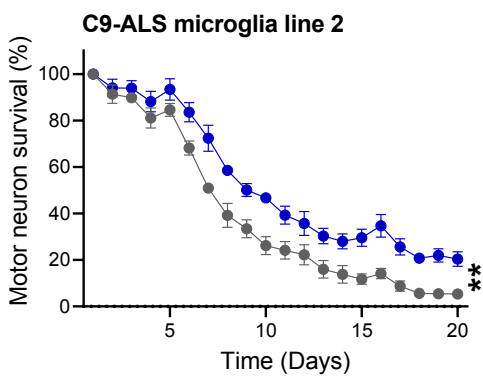

## C

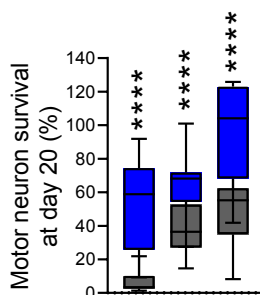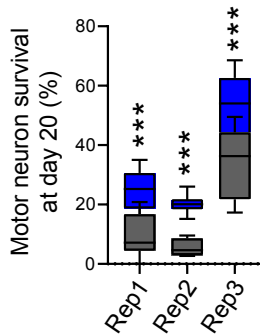

## D

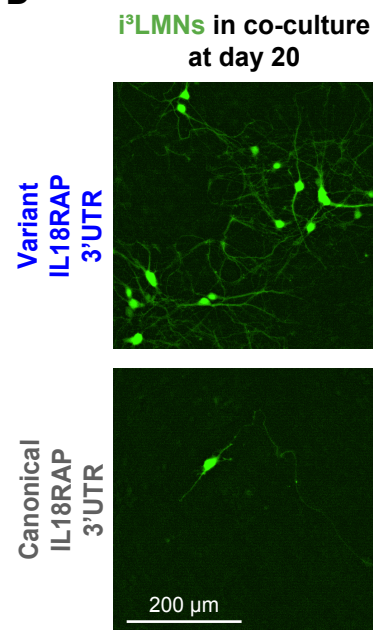

## E

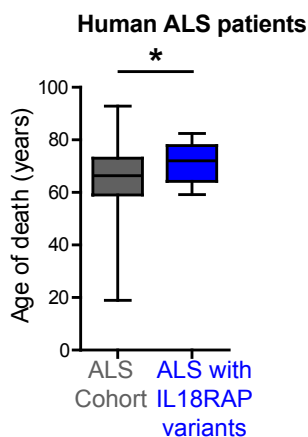

## F

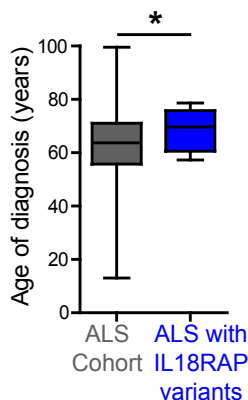

820 **Fig. 6. Variant IL18RAP 3'UTR are protective in human microglia and in patients with ALS. (A)** Diagram of  
821 experimental design. Co-culture of human iPSC-derived transcription factor-induced motor neurons (i<sup>3</sup>LMNs) that  
822 express GFP driven by the synapsin (Syn) promoter (healthy, non-ALS, <sup>76</sup>) and human iPSC-derived isogenic  
823 IL18RAP 3'UTR microglia (on a *C9orf72 repeat expansion background*). Time-lapse microscopic analyses of i<sup>3</sup>LMNs  
824 survival, after microglia activation with a cocktail of LPS and the cytokine IL-18. **(B,C)** i<sup>3</sup>LMNs survival over 20 days  
825 in the presence of microglia harboring variant (blue) or canonical (grey) IL18RAP 3'UTR (two independent isogenic  
826 pairs, based on independent patient C9orf72 lines, n=3 independent differentiation procedures from different  
827 passages per line, with 3-8 co-culture wells per passage). **(B)** Survival plot of i<sup>3</sup>LMNs in a representative experiment  
828 for each isogenic pair (Two-way ANOVA) and **(C)** Box plot depicting the percentage of i<sup>3</sup>LMNs survival on day 20  
829 of co-culture, median, upper and lower quartiles of all experiments. Two independent isogenic pairs, based on  
830 independent patient C9orf72 lines, n=3 independent differentiation procedures from different passages per line,  
831 with 3-8 co-culture wells per passage. Two-way ANOVA followed by Tukey's multiple comparison test. **(D)**  
832 Representative micrographs of fluorescent i<sup>3</sup>LMNs after 20 days of culture with C9-ALS microglia. **(E)**. Association  
833 of age of death (9 patients with protective 3'UTR variants /4263 patients with available phenotypic data in Project  
834 MinE and NYGC cohorts, or **(F)** age of diagnosis (8/4216 patients). IL18RAP variant is associated with delayed age  
835 of death (+6.1 years, Permutation P-value = 0.02, Cohen's d effect size = 0.65) and age of diagnosis (+6.2 years,  
836 Permutation P-value = 0.05, Cohen's d effect size = 0.62), relative to the mean age of all Project MinE and NYGC  
837 ALS patients. Box plots depicting median, upper and lower quartiles, and extreme points. \* P<0.05, \*\* P<0.01,  
838 \*\*\* P<0.001, \*\*\*\* P<0.0001.

839

840

841

842

843

844

845

846

847

**A**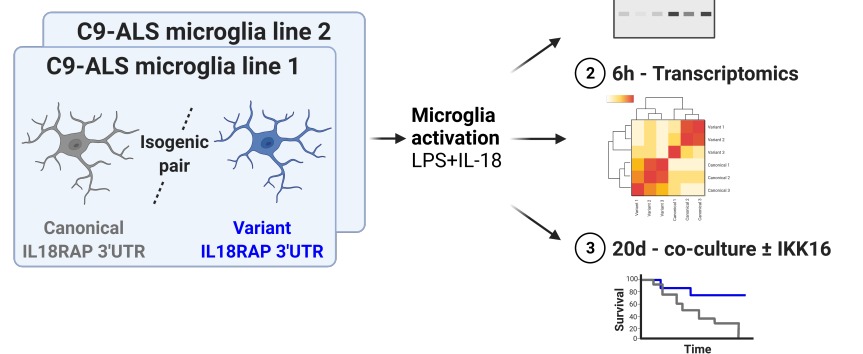**B**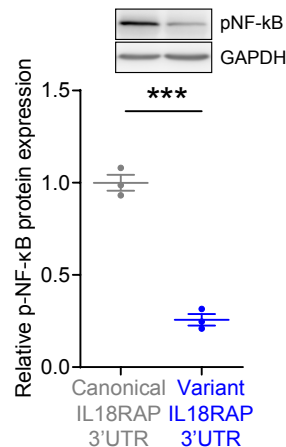**C**

Enriched KEGG Pathways

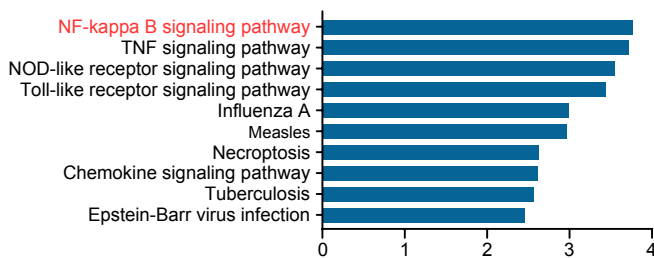**D**

Enriched Gene Ontology Biological Process

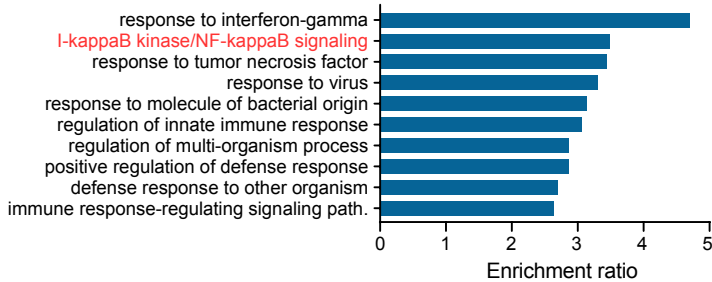**F**

C9-ALS microglia line 1

C9-ALS microglia line 2

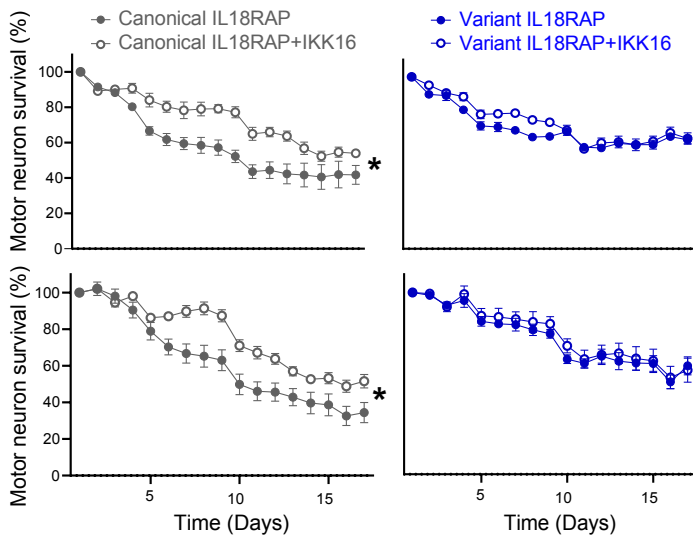**E**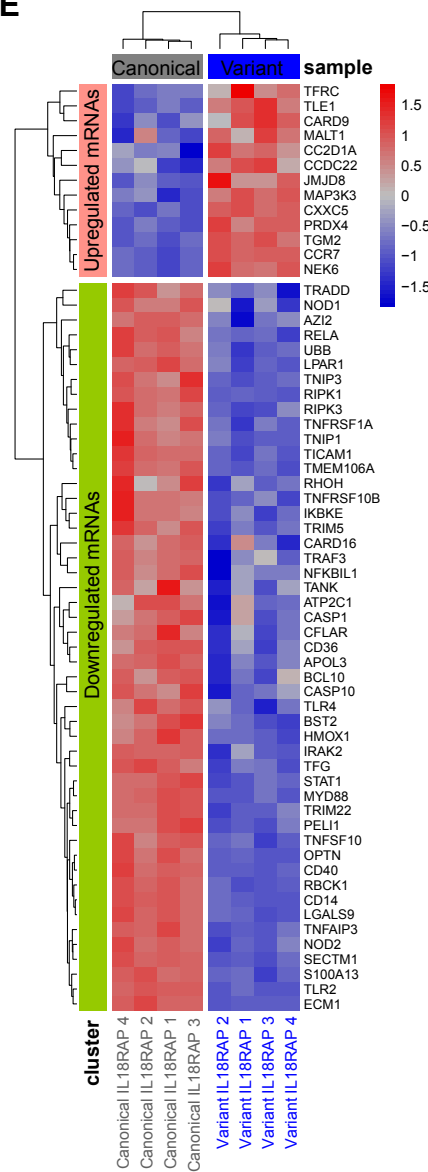

848 **Fig. 7. Variant IL18RAP 3'UTR dampens neurotoxic NF- $\kappa$ B signaling in human microglia. (A)** Diagram of  
849 experimental design. Four IL18RAP 3'UTR lines (two isogenic pairs) were differentiated into human microglia <sup>68</sup>  
850 and analyzed for phosphorylated NF- $\kappa$ B protein levels, transcriptomics, and neuronal survival in co-culture  
851 with/without IKK16, following activation with a cocktail of LPS and the cytokine IL-18, for 0.5h, 6h and 20 days,  
852 respectively. **(B)** Western blot analysis revealed reduced levels of phosphorylated NF- $\kappa$ B in variant IL18RAP 3'UTR  
853 relative to isogenic control. Scatter dot plot with mean and SEM (Two sided t-test P-value \*\*\* <0.001, N=3, [Data](#)  
854 [File S5](#)). mRNA extracted from human microglia was subjected to a next generation sequencing study with  
855 downstream bioinformatics studies **(C-E)**. Over-representation analysis (ORA) within **(C)** KEGG Pathways and **(D)**  
856 Gene Ontology biological processes, of the differentially expressed transcriptome in microglia harboring variant  
857 vs. canonical IL18RAP 3'UTR. Bar graph depicting the Ratio of enrichment for significantly enriched pathways (FDR  
858  $\leq 0.05$ ) are shown ([Supplementary Table 13](#); WebGestalt <sup>104</sup>). **(E)** Unsupervised study of the NF- $\kappa$ B transcriptomic  
859 signature (GO:0007249 pathway-associated mRNAs) in microglia with the variant relative to the isogenic canonical  
860 IL18RAP 3'UTR. **(F)** Time-lapse microscopic analyses of co-cultured human i<sup>3</sup>LMNs (healthy, non-ALS, <sup>76</sup>) with  
861 human iPSC-derived isogenic IL18RAP 3'UTR microglia (on a *C9orf72 repeat expansion background*), activated with  
862 a cocktail of LPS and the cytokine IL-18, without (carrier alone, DMSO), or with IKK16 (200nM), a selective I $\kappa$ B  
863 kinase (IKK) inhibitor that inhibits NF- $\kappa$ B signaling <sup>81</sup>. IKK16 significantly ameliorates motor neuron death, relative  
864 to control only in the context of canonical IL18RAP 3'UTR, but did not further contribute to rescue in human  
865 microglia with the protective variant IL18RAP 3'UTR (two independent isogenic pairs, based on independent  
866 patient C9orf72 lines with 3-8 co-culture wells per line). Two-way ANOVA P-value \* <0.05.

867

868

869

870

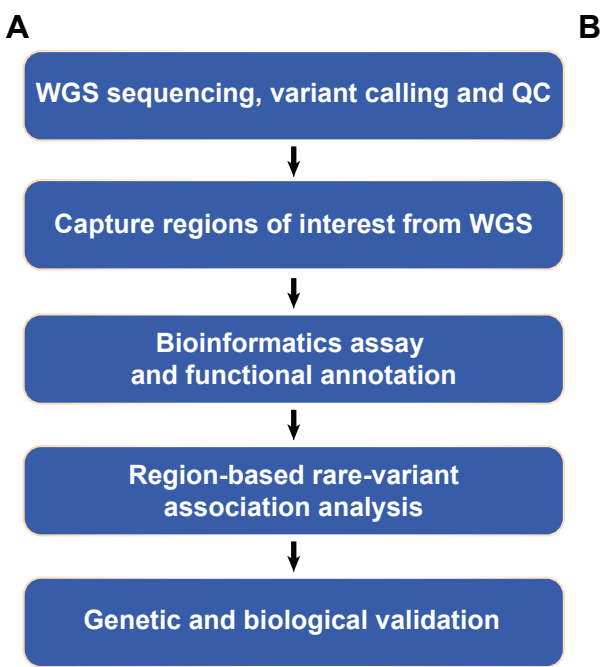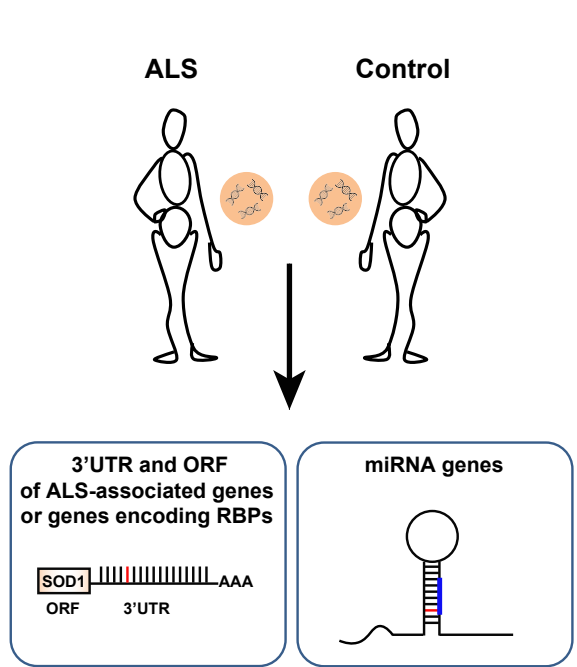

871 **Supplementary Fig. 1. Study design. (A)** Flow chart of approach for discovery of region-based rare-variants in  
872 non-coding genomic regions via association studies and **(B)** diagram depicting regions of interest comprising of  
873 1,750 autosomal human pre-miRNA genes, 295 open reading frames encoding for proteins of interest, and 295  
874 3'UTRs.

875

876

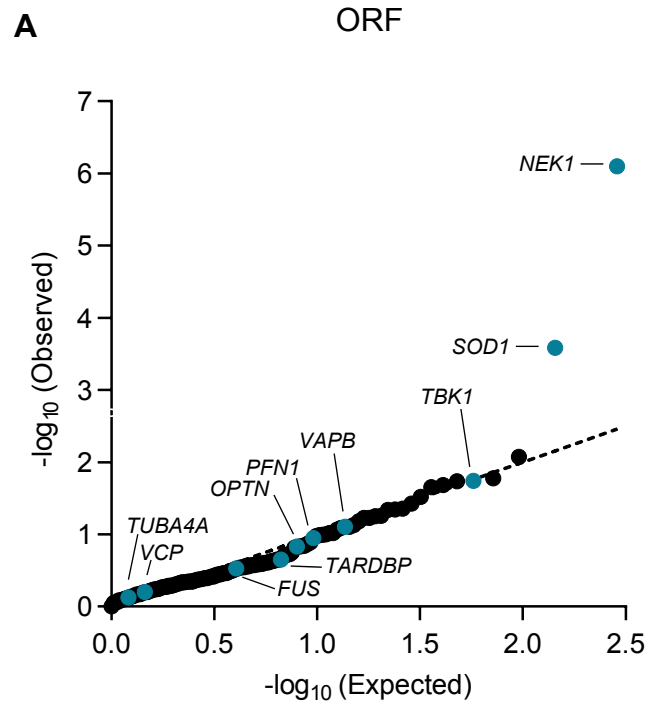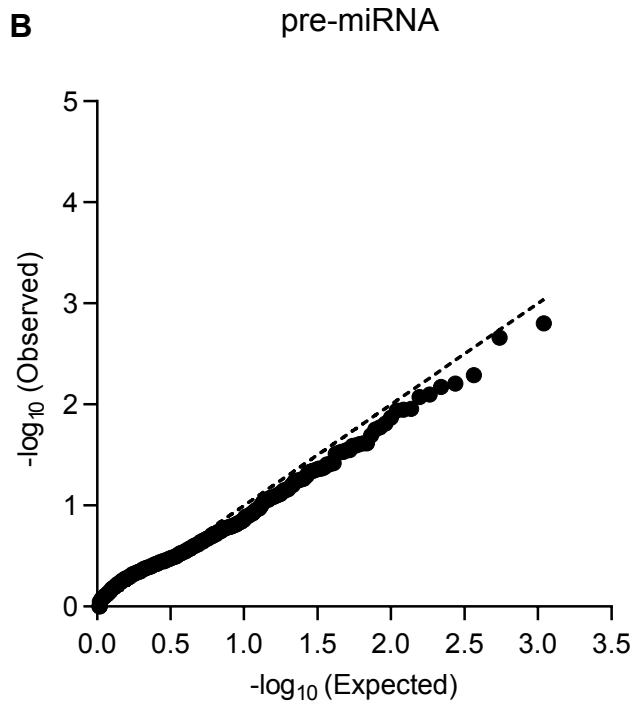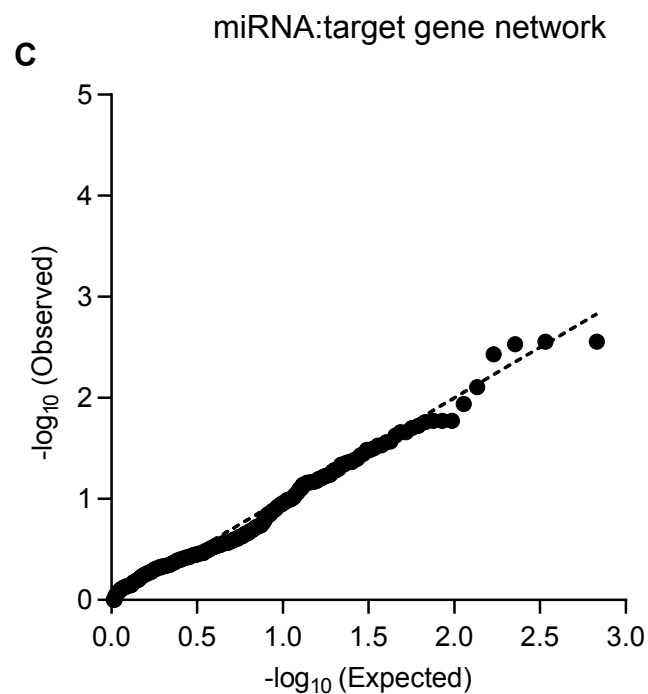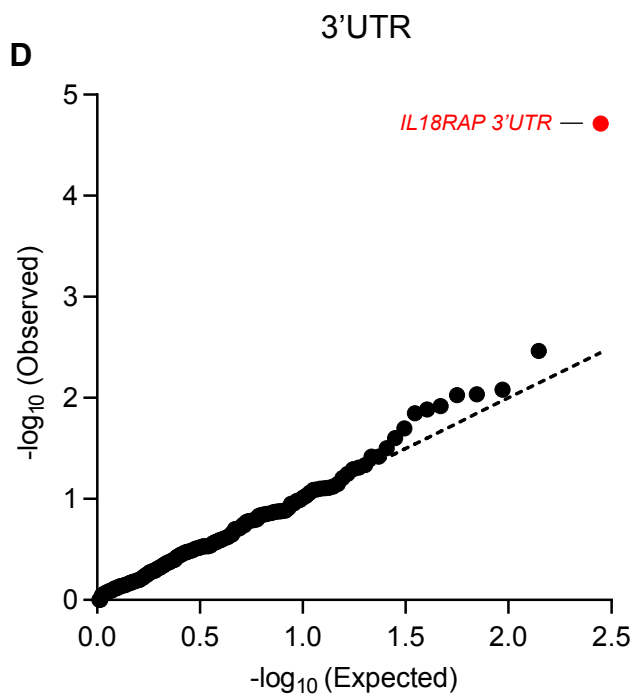



877 **Supplementary Fig. 2. Region-based rare-variant association analyses. (A-D)** QQ plot of obtained and expected  
878 P-values for the burden of rare-variants (log scale) gained by collapsed region-based association analysis of  
879 different genomic regions, comprised of (A) 295 candidate protein-coding regions listed in [Supplementary Table](#)  
880 [3](#). These ORFs encode for ALS-relevant proteins or proteins that are associated with miRNA biogenesis or activity.  
881 Variants were depicted if predicted to cause frameshifting, alternative splicing, abnormal stop codon or a  
882 deleterious non-synonymous amino acid substitution, in  $\geq 3$  of 7 independent dbNSFP prediction algorithms  
883 (genomic inflation  $\lambda = 0.96$ ), (B) All known pre-miRNA genes in the human genome (genomic inflation  $\lambda = 1.31$ ),  
884 (C) predicted networks, comprised of aggregated variants detected on a specific mature miRNA sequence and its  
885 cognate downstream 3'UTR targets (genomic inflation  $\lambda = 1.16$ ), and (D) variants in 3'UTRs of the same 295 genes  
886 listed in [Supplementary Table 3](#) (genomic inflation  $\lambda = 1.08$ ). Data was obtained from 3,955 ALS cases and 1,819  
887 controls (Project MinE). Features positioned on the diagonal line represent results obtained under the null  
888 hypothesis. Open-reading frames of 10 known ALS genes (blue). IL18RAP 3'UTR (red). P-values, calculated with  
889 SKAT-O.

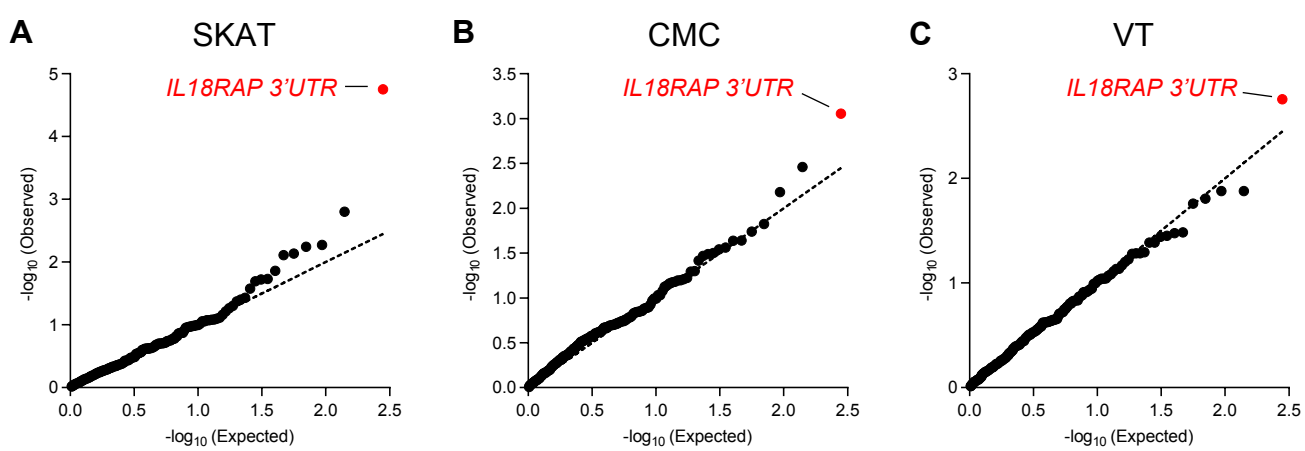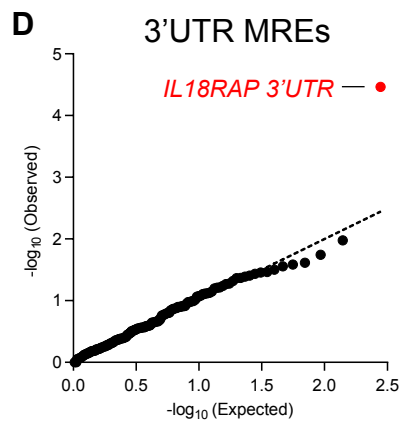

**E Human IL18RAP**  
 ENST00000264260 Chr2:103035149-103069025 [GRCh37/hg19]  
 3'UTR length: 384 Chr2:103068641-103069025 [GRCh37/hg19]

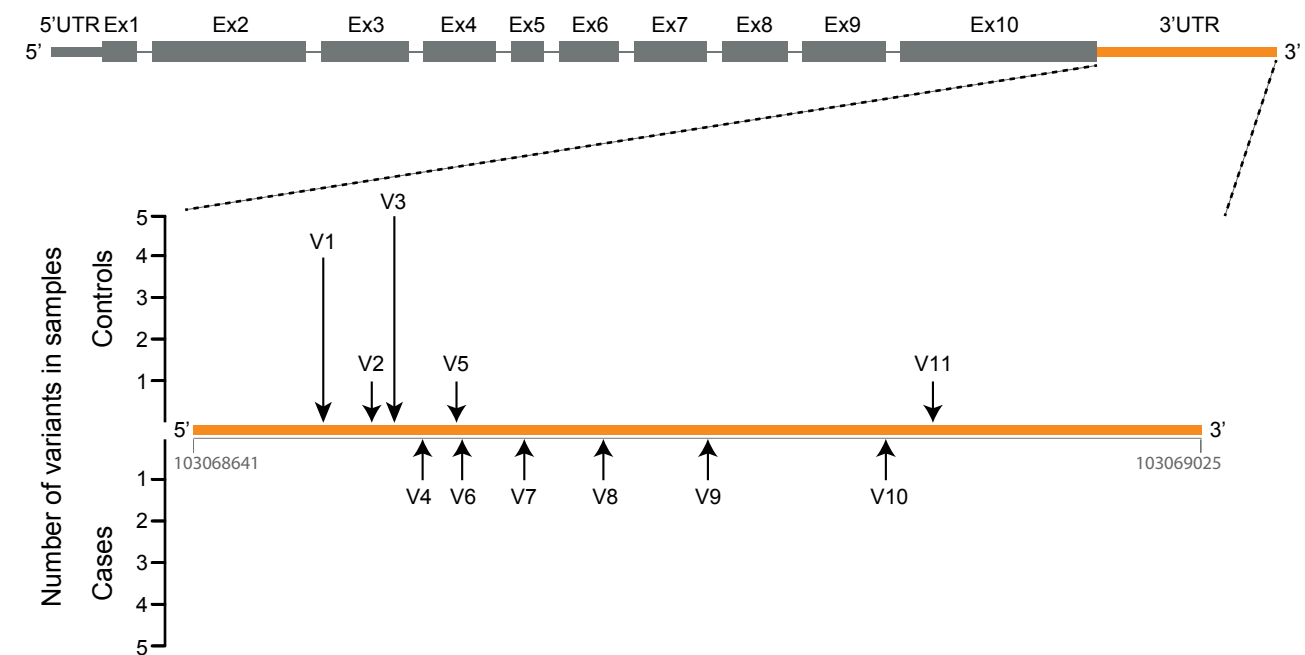

890 **Supplementary Fig. 3. 3'UTR-based rare-variant association analysis, using different algorithms, and illustration**  
891 **of rare variants identified in the IL18RAP 3'UTR. (A-D)** QQ plot of obtained and expected P-values for the burden  
892 of rare variants (log scale) gained by collapsed region-based association analysis of genomic regions comprised of  
893 295 3'UTRs listed in [Supplementary Table 3](#), in the Project MinE cohort (3,955 ALS cases and 1,819 non-ALS  
894 controls). Features positioned on the diagonal line represent results obtained under the null hypothesis. IL18RAP  
895 3'UTR (red) is the most significant 3'UTR associated with ALS using different algorithms: **(A)** Sequence Kernel  
896 Association Test, SKAT (genomic inflation  $\lambda = 1.02$ ), **(B)** Combined Multivariate and Collapsing, CMC (genomic  
897 inflation  $\lambda = 1.34$ ), **(C)** Variable Threshold with permutation analysis, VT (genomic inflation  $\lambda = 1.03$ ). **(D)** IL18RAP  
898 3'UTR also ranked as the top hit when aggregating variants abrogating or gaining miRNA recognition elements  
899 (MREs) in 3'UTRs (genomic inflation  $\lambda = 1.04$ ). **(E)** Schematic of the IL18RAP transcript and 3'UTR (5' to 3') showing  
900 the number of control (upper) or ALS (lower) samples in which variants (black arrow) were identified in the Project  
901 MinE discovery cohort ([Supplementary Table 6](#)).

902

903

904

905

906

907

908

909

910

911

912

913

914

**A**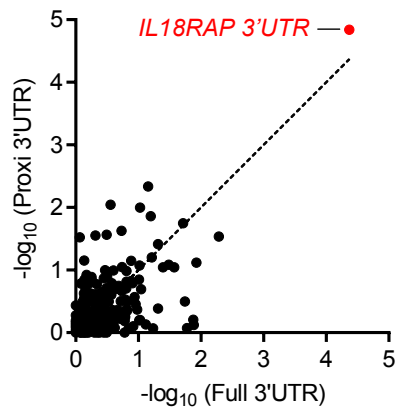**B**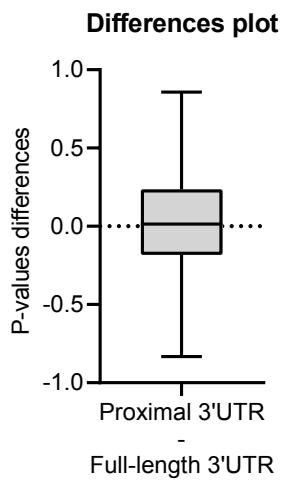

915 **Supplementary Fig. 4. Restricting burden analysis to the proximal part of 3'UTRs does not improve the**  
916 **association signal. (A)** Scatter plot with SKAT-O P-values (log scale) calculated for the burden of rare variants  
917 gained by collapsed region-based association analysis of the full 3'UTRs on the x-axis versus the 3'UTRs proximal  
918 quadrant on the y-axis, for the 295 3'UTRs listed in [Supplementary Table 3](#), in the Project MinE cohort (3,955 ALS  
919 cases and 1,819 non-ALS controls) (Pearson correlation coefficient ( $r=0.61$ ) and P-value \*\*\*\* $<0.0001$ ). The 45-  
920 degree diagonal line represents a perfect correlation of  $r=1$ . IL18RAP 3'UTR (red). **(B)** A Difference plot showing  
921 the difference between the two P-value measurements (3'UTRs proximal quadrant minus the full 3'UTRs). The  
922 bias (difference between means) is only 0.03. Overall the P-values gained from the 3'UTRs proximal quadrant were  
923 comparable to that of the full 3'UTRs in the cohort of 295 3'UTRs. Box plots depict median, upper and lower  
924 quartiles, and extreme points (Wilcoxon matched-pairs P-value  $> 0.05$ , Cohen's d effect size = 0.1). Hence, the  
925 apparent spatial distribution of variants in IL18RAP 3'UTR seems to be a particular case, rather than part of a  
926 global pattern.

927

928

929

930

931

932

933

934

935

936

937

938

939

# Lymphoblastoid cell lines

**A**

## IL18RAP mRNA

ns ● Control; Canonical IL18RAP 3'UTR  
● C9orf72; Canonical IL18RAP 3'UTR

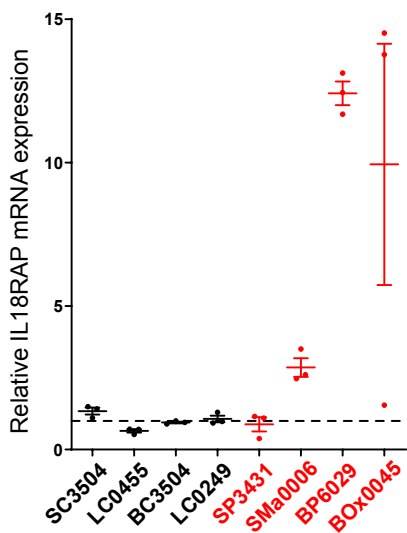

**B**

## IL18RAP protein

p=0.056 ● Control; Canonical IL18RAP 3'UTR  
● C9orf72; Canonical IL18RAP 3'UTR

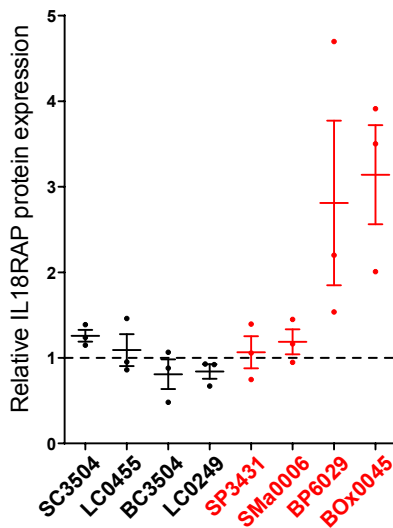

**C**

## pNF-κB protein

\*\* ● Control; Canonical IL18RAP 3'UTR  
● C9orf72; Canonical IL18RAP 3'UTR

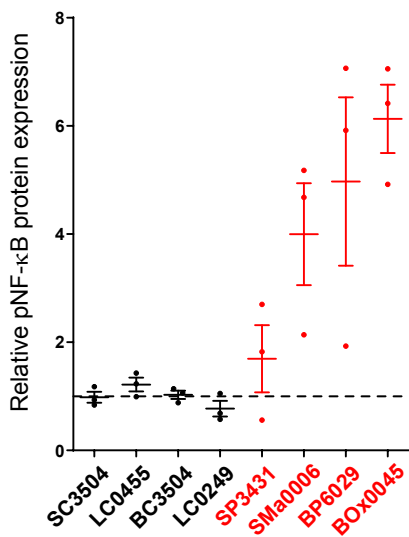

**D**

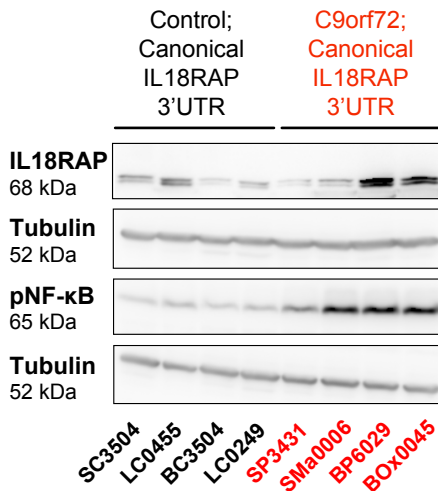

940 **Supplementary Fig. 5. IL18RAP and p-NF- $\kappa$ B expression is elevated in lymphoblastoid cells from patients with**  
941 **the C9orf72 repeat expansion. (A)** IL18RAP mRNA expression (qPCR normalized to IPO8 mRNA levels) and **(B)**  
942 IL18RAP or **(C)** p-NF- $\kappa$ B protein expression (Western blots, normalized to Tubulin). Extracts from eight different  
943 human lymphoblastoid cell lines (listed in [Supplementary Table 8](#)): Four lines of healthy individuals (without ALS)  
944 carrying the canonical IL18RAP 3'UTR sequence (Control; Canonical IL18RAP 3'UTR, black) and four C9orf72 ALS  
945 patients carrying the canonical IL18RAP 3'UTR sequence (C9orf72; Canonical IL18RAP 3'UTR, red). **(D)**  
946 Representative blots processed with anti-IL18RAP, anti p-NF- $\kappa$ B and anti-Tubulin antibodies. Mann-Whitney test  
947 (A) or one-sided student's t-test with Welch's correction on log-transformed data (B,C), was conducted based on  
948 the mean value of three independent passages for each of the eight human lymphoblastoid cell lines. Scatter dot  
949 plot with mean and SEM. \*\* P<0.01.

950

951

952

953

954

955

956

957

958

959

960

961

962

963

## A Biosensor for NF- $\kappa$ B pathway activity

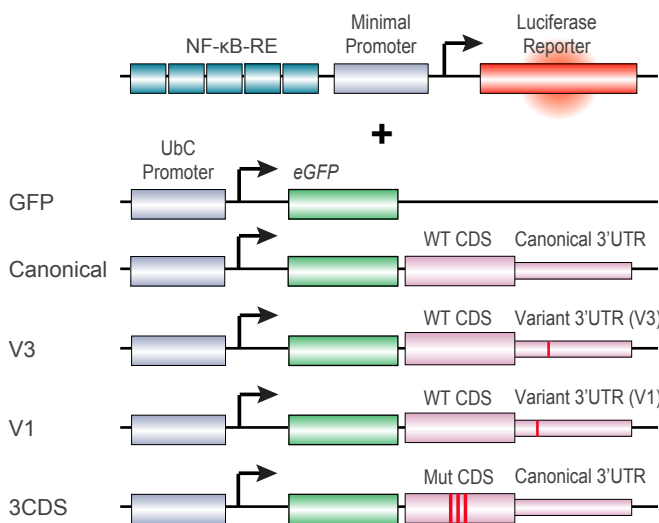

## B U2OS cells

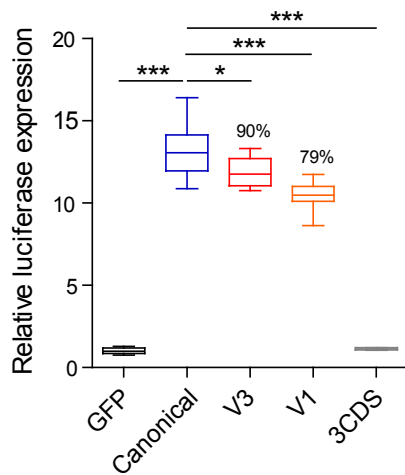



964 **Supplementary Fig. 6. IL18RAP 3'UTR variant attenuates IL-18 - NF- $\kappa$ B signaling in U2OS cells.** Diagram **(A)** and  
965 quantification **(B)** of NF- $\kappa$ B reporter assays in human U2OS cell line. To determine the ability of the IL18RAP  
966 variants V3 and V1 to induce NF- $\kappa$ B activity, U2OS cells were co-transfected with different IL18RAP coding region  
967 (CDS) and 3'UTR constructs (GFP, Canonical, V3, V1,  $n=9$ ; 3CDS,  $n=4$ ), along with an NF- $\kappa$ B activity reporter that  
968 drives luciferase (Luc2P) transcription via five copies of the NF- $\kappa$ B response element. NF- $\kappa$ B signaling was induced  
969 by adding human recombinant IL-18 to the medium. Variants V3 and V1 of the IL18RAP 3'UTR reduced NF- $\kappa$ B  
970 activity by  $\sim 10\%$  and  $\sim 21\%$ , respectively, relative to the WT IL18RAP 3'UTR. GFP vector and a dominant-negative  
971 coding mutant E210A-Y212A-Y214A CDS + WT 3'UTR (3CDS)<sup>41</sup>, served as controls. Luciferase expression was  
972 normalized to transfected U2OS cells that were not induced with human recombinant IL-18. One-way ANOVA  
973 followed by Dunnett's multiple comparison test was performed on square root-transformed data. Box plots depict  
974 median, upper and lower quartiles, and extreme points. \*  $P < 0.05$ ; \*\*\*  $P < 0.001$ . The experiment was repeated  
975 independently three times with similar results.

976

977

978

979

980

981

982

983

984

985

986

987

988

**A**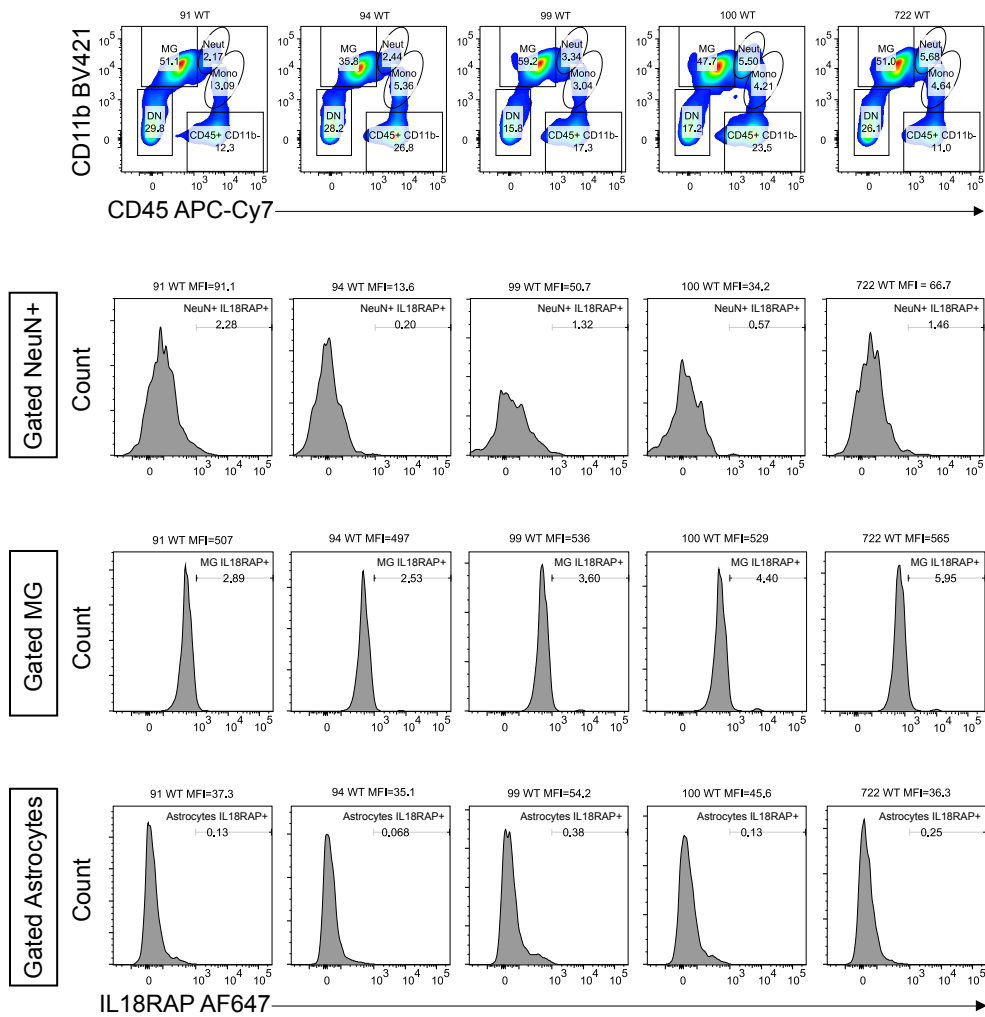**B**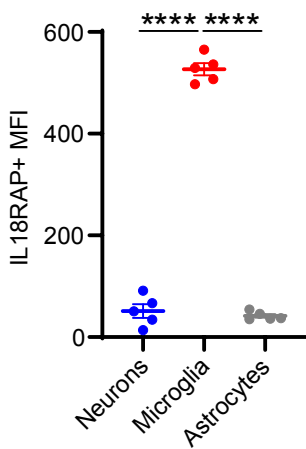**C**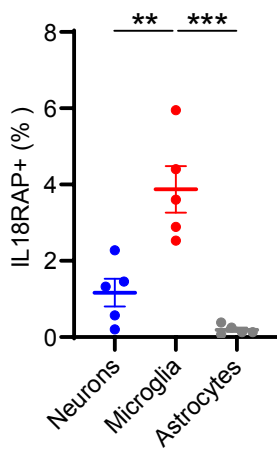

989 **Supplementary Fig. 7. IL18RAP is mainly expressed on mouse microglia cells.** (A-C) Flow cytometry was used to  
990 characterize IL18RAP expression levels in dissociated wild-type mouse cortex cells. The expression of IL-18RAP (IL-  
991 18R $\beta$ ) was expressed as Mean Fluorescence Intensity (MFI) and % frequency after gating for the following cell  
992 types: immune cells (CD45<sup>hi</sup>), microglia (MG: CD45<sup>int</sup> CD11b<sup>hi</sup>), neurons (CD45<sup>-</sup> CD11b<sup>-</sup> NeuN<sup>+</sup>), and astrocytes  
993 (CD45<sup>-</sup> CD11b<sup>-</sup> GFAP<sup>+</sup>). FACS analysis reveals that IL18RAP is mainly expressed on microglia cells. A scatter dot  
994 plot with mean and SEM values for the median fluorescence intensity (MFI) and percentage of IL18RAP<sup>+</sup> cells is  
995 shown. One-way ANOVA followed by Tukey's multiple comparison test. \*\* P<0.01, \*\*\* P<0.001, \*\*\*\* P<0.0001.

996

997

998

999

1000

1001

1002

1003

1004

1005

1006

1007

1008

1009

1010

1011

1012

**A**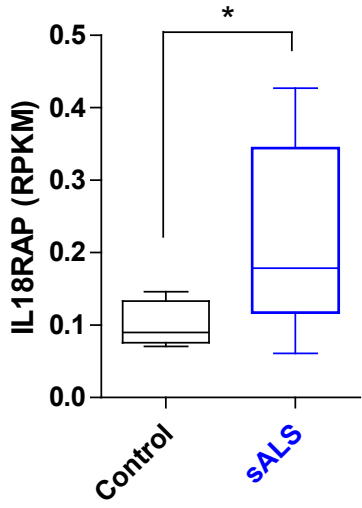**B**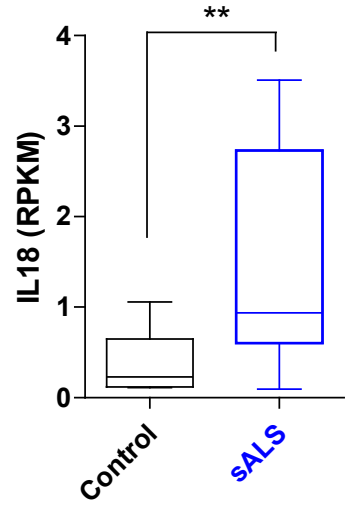**C**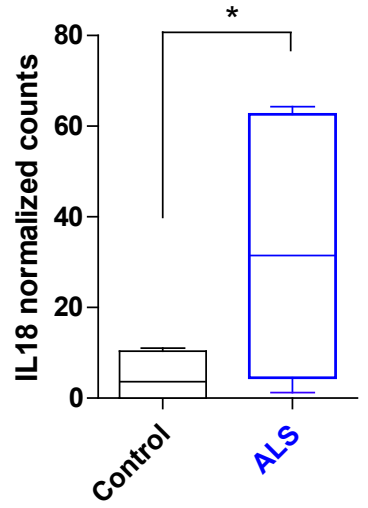

1013 **Supplementary Fig. 8. Evaluation of IL18RAP and IL-18 mRNA expression in motor neurons of patients with ALS.**  
1014 **(A-B)** mRNA expression of IL18RAP **(A)** and IL-18 **(B)**, as reads per kilobase million (RPKM), from NGS study of laser  
1015 capture microdissection–enriched surviving motor neurons from lumbar spinal cords of patients with sALS with  
1016 rostral onset and caudal progression (n = 12) and non-neurodegeneration controls (n = 9; <sup>106</sup> GSE76220). Two-  
1017 sided Student’s t test with Welch's correction on log-transformed data. **(C)** IL-18 mRNA expression, as log2-  
1018 normalized counts, from NGS study of induced ALS motor neurons (n = 4 different donors in duplicates) or non-  
1019 neurodegeneration controls (n=3 different donors in duplicates; <sup>107</sup> DESeq analysis). Box plots depict median,  
1020 upper and lower quartiles, and extreme points. \*P < 0.05; \*\*P < 0.01.

1021

1022

1023

1024

1025

1026

1027

1028

1029

1030

1031

1032

1033

1034

1035

1036

**C9-ALS microglia line 1**

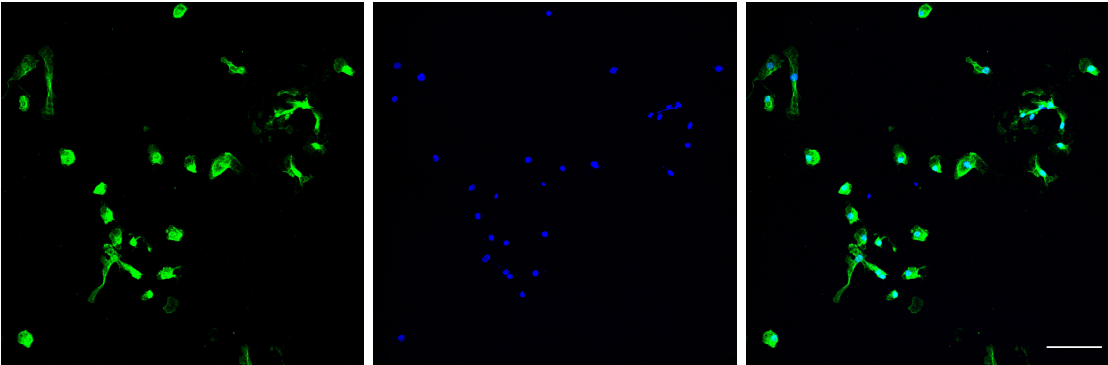

**C9-ALS microglia line 2**

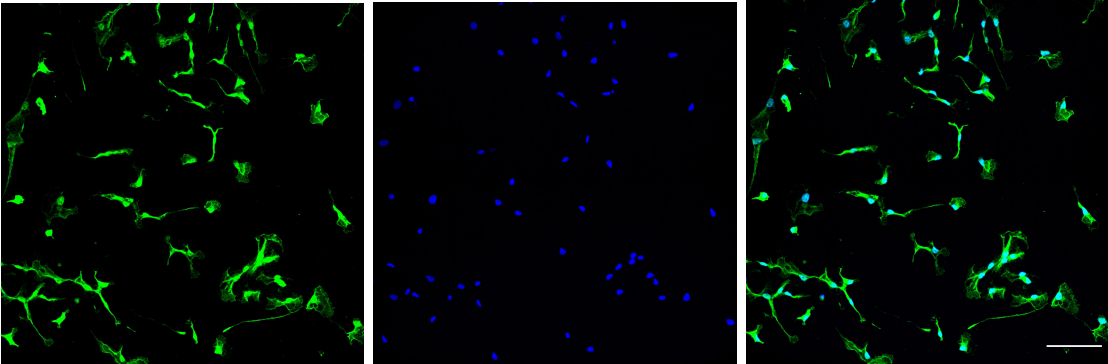

1037 **Supplementary Fig. 9. iPSC-derived microglia express the microglial-specific marker, TMEM119.**  
1038 Immunofluorescence staining of TMEM119 (green) and DAPI (blue), in two different C9orf72 iPSC-derived  
1039 progenitor microglia lines. Lens, ×20; scale bar, 100 μm.

1040

1041

1042

1043

1044

1045

1046

1047

1048

1049

1050

1051

1052

1053

1054

1055

1056

1057

1058

**A**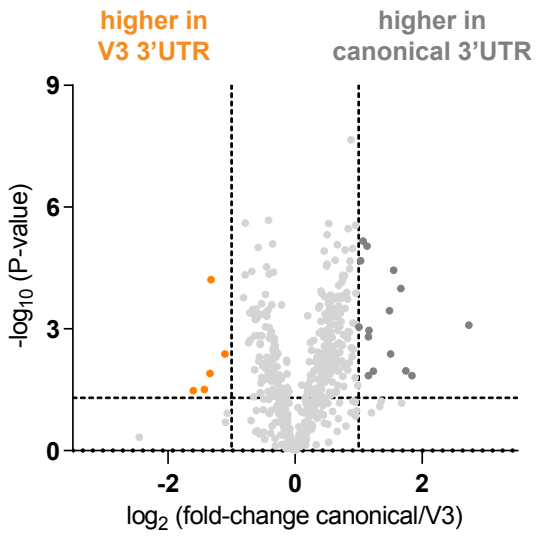**B**

**IL18RAP 3'UTR secondary structure prediction**

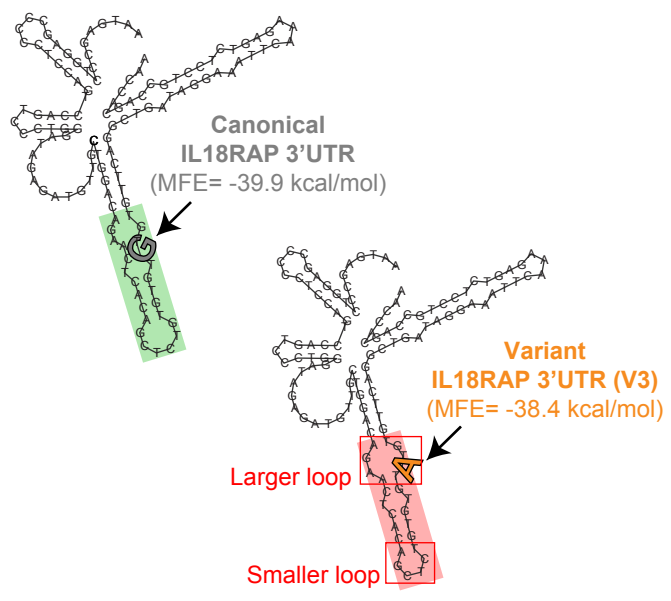



1059 **Supplementary Fig. 10. Differentially bound RNA binding proteins to variant 3'UTR (V3) relative to canonical**  
1060 **3'UTR. (A)** Volcano plot of protein abundance associated with the canonical relative to variant (V3) IL18RAP 3'UTR  
1061 (x-axis log<sub>2</sub> scale), analyzed by MS. Y-axis depicts P-values (-log<sub>10</sub> scale). Proteins significantly enriched in  
1062 association with canonical/variant 3'UTR are colored (grey/orange). Features above the horizontal dashed line  
1063 demarcate proteins with adjusted p < 0.05, in student's t-test with FDR correction to multiple hypotheses. Vertical  
1064 dashed lines are of 2 or ½ fold change ([Supplementary Table 9](#)). **(B)** Prediction of 3'UTR secondary structure by  
1065 RNA Fold <sup>105</sup>, suggests a minor change to the structure of the sequence harboring a V3 variant (red), relative to  
1066 the canonical 3'UTR (green).

1067

1068

1069

1070

1071

1072

1073

1074

1075

1076

1077

1078

1079

1080

1081

1082

1083 **References**

1084

- 1085 1. Cookson, W., Liang, L., Abecasis, G., Moffatt, M. & Lathrop, M. Mapping complex disease traits with  
1086 global gene expression. *Nat Rev Genet* **10**, 184-194 (2009).
- 1087 2. Knight, J.C. Regulatory polymorphisms underlying complex disease traits. *J Mol Med (Berl)* **83**, 97-109  
1088 (2005).
- 1089 3. Brown, R.H. & Al-Chalabi, A. Amyotrophic Lateral Sclerosis. *N Engl J Med* **377**, 162-172 (2017).
- 1090 4. Taylor, J.P., Brown, R.H., Jr. & Cleveland, D.W. Decoding ALS: from genes to mechanism. *Nature* **539**,  
1091 197-206 (2016).
- 1092 5. Renton, A.E., Chio, A. & Traynor, B.J. State of play in amyotrophic lateral sclerosis genetics. *Nat Neurosci*  
1093 **17**, 17-23 (2014).
- 1094 6. Al-Chalabi, A., van den Berg, L.H. & Veldink, J. Gene discovery in amyotrophic lateral sclerosis:  
1095 implications for clinical management. *Nat Rev Neurol* **13**, 96-104 (2017).
- 1096 7. van Rheenen, W., *et al.* Common and Rare Variant Association Analyses in Amyotrophic Lateral Sclerosis  
1097 Identify 15 Risk Loci with Distinct Genetic Architectures and Neuron-Specific Biology. *MedRxiv* (2021).
- 1098 8. DeJesus-Hernandez, M., *et al.* Expanded GGGGCC hexanucleotide repeat in noncoding region of  
1099 C9ORF72 causes chromosome 9p-linked FTD and ALS. *Neuron* **72**, 245-256 (2011).
- 1100 9. Renton, A.E., *et al.* A hexanucleotide repeat expansion in C9ORF72 is the cause of chromosome 9p21-  
1101 linked ALS-FTD. *Neuron* **72**, 257-268 (2011).
- 1102 10. La Spada, A.R. & Taylor, J.P. Repeat expansion disease: progress and puzzles in disease pathogenesis.  
1103 *Nat Rev Genet* **11**, 247-258 (2010).
- 1104 11. Cooper-Knock, J., *et al.* Rare Variant Burden Analysis within Enhancers Identifies CAV1 as an ALS Risk  
1105 Gene. *Cell Rep* **33**, 108456 (2020).
- 1106 12. Povysil, G., *et al.* Rare-variant collapsing analyses for complex traits: guidelines and applications. *Nat Rev*  
1107 *Genet* **20**, 747-759 (2019).
- 1108 13. An, J.Y., *et al.* Genome-wide de novo risk score implicates promoter variation in autism spectrum  
1109 disorder. *Science* **362** (2018).
- 1110 14. Bartel, D.P. MicroRNAs: target recognition and regulatory functions. *Cell* **136**, 215-233 (2009).
- 1111 15. Mayr, C. Regulation by 3'-Untranslated Regions. *Annu Rev Genet* **51**, 171-194 (2017).
- 1112 16. Haramati, S., *et al.* miRNA malfunction causes spinal motor neuron disease. *Proc Natl Acad Sci U S A* **107**,  
1113 13111-13116 (2010).

- 1114 17. Emde, A., *et al.* Dysregulated miRNA biogenesis downstream of cellular stress and ALS-causing  
1115 mutations: a new mechanism for ALS. *EMBO J* **34**, 2633-2651 (2015).
- 1116 18. Eitan, C. & Hornstein, E. Vulnerability of microRNA biogenesis in FTD-ALS. *Brain Res* (2016).
- 1117 19. Campos-Melo, D., Droppelmann, C.A., He, Z., Volkening, K. & Strong, M.J. Altered microRNA expression  
1118 profile in Amyotrophic Lateral Sclerosis: a role in the regulation of NFL mRNA levels. *Mol Brain* **6**, 26 (2013).
- 1119 20. Buratti, E., *et al.* Nuclear factor TDP-43 can affect selected microRNA levels. *FEBS J* **277**, 2268-2281  
1120 (2010).
- 1121 21. Kawahara, Y. & Mieda-Sato, A. TDP-43 promotes microRNA biogenesis as a component of the Drosha  
1122 and Dicer complexes. *Proc Natl Acad Sci U S A* **109**, 3347-3352 (2012).
- 1123 22. Morlando, M., *et al.* FUS stimulates microRNA biogenesis by facilitating co-transcriptional Drosha  
1124 recruitment. *EMBO J* **31**, 4502-4510 (2012).
- 1125 23. Hoye, M.L., *et al.* MicroRNA Profiling Reveals Marker of Motor Neuron Disease in ALS Models. *J Neurosci*  
1126 **37**, 5574-5586 (2017).
- 1127 24. Rotem, N., *et al.* ALS Along the Axons - Expression of Coding and Noncoding RNA Differs in Axons of ALS  
1128 models. *Sci Rep* **7**, 44500 (2017).
- 1129 25. Butovsky, O., *et al.* Modulating inflammatory monocytes with a unique microRNA gene signature  
1130 ameliorates murine ALS. *J Clin Invest* **122**, 3063-3087 (2012).
- 1131 26. Figueroa-Romero, C., *et al.* Expression of microRNAs in human post-mortem amyotrophic lateral  
1132 sclerosis spinal cords provides insight into disease mechanisms. *Mol Cell Neurosci* **71**, 34-45 (2016).
- 1133 27. Williams, A.H., *et al.* MicroRNA-206 delays ALS progression and promotes regeneration of  
1134 neuromuscular synapses in mice. *Science* **326**, 1549-1554 (2009).
- 1135 28. Hickman, S., Izzy, S., Sen, P., Morsett, L. & El Khoury, J. Microglia in neurodegeneration. *Nat Neurosci* **21**,  
1136 1359-1369 (2018).
- 1137 29. Beers, D.R. & Appel, S.H. Immune dysregulation in amyotrophic lateral sclerosis: mechanisms and  
1138 emerging therapies. *Lancet Neurol* **18**, 211-220 (2019).
- 1139 30. Lall, D. & Baloh, R.H. Microglia and C9orf72 in neuroinflammation and ALS and frontotemporal  
1140 dementia. *J Clin Invest* **127**, 3250-3258 (2017).
- 1141 31. Zhao, W., *et al.* TDP-43 activates microglia through NF-kappaB and NLRP3 inflammasome. *Exp Neurol*  
1142 **273**, 24-35 (2015).
- 1143 32. Vahsen, B.F., *et al.* Non-neuronal cells in amyotrophic lateral sclerosis - from pathogenesis to  
1144 biomarkers. *Nat Rev Neurol* **17**, 333-348 (2021).

- 1145 33. McCauley, M.E. & Baloh, R.H. Inflammation in ALS/FTD pathogenesis. *Acta Neuropathol* **137**, 715-730  
1146 (2019).
- 1147 34. Motataianu, A., Barcutean, L. & Balasa, R. Neuroimmunity in amyotrophic lateral sclerosis: focus on  
1148 microglia. *Amyotroph Lateral Scler Frontotemporal Degener* **21**, 159-166 (2020).
- 1149 35. Philips, T. & Robberecht, W. Neuroinflammation in amyotrophic lateral sclerosis: role of glial activation  
1150 in motor neuron disease. *Lancet Neurol* **10**, 253-263 (2011).
- 1151 36. Kadhim, H., Deltenre, P., Martin, J.J. & Sebire, G. In-situ expression of Interleukin-18 and associated  
1152 mediators in the human brain of sALS patients: Hypothesis for a role for immune-inflammatory mechanisms.  
1153 *Med Hypotheses* **86**, 14-17 (2016).
- 1154 37. Johann, S., *et al.* NLRP3 inflammasome is expressed by astrocytes in the SOD1 mouse model of ALS and  
1155 in human sporadic ALS patients. *Glia* **63**, 2260-2273 (2015).
- 1156 38. Italiani, P., *et al.* Evaluating the levels of interleukin-1 family cytokines in sporadic amyotrophic lateral  
1157 sclerosis. *J Neuroinflammation* **11**, 94 (2014).
- 1158 39. Huang, F., *et al.* Longitudinal biomarkers in amyotrophic lateral sclerosis. *Ann Clin Transl Neurol* **7**, 1103-  
1159 1116 (2020).
- 1160 40. Alboni, S., Cervia, D., Sugama, S. & Conti, B. Interleukin 18 in the CNS. *J Neuroinflammation* **7**, 9 (2010).
- 1161 41. Tsutsumi, N., *et al.* The structural basis for receptor recognition of human interleukin-18. *Nature*  
1162 *communications* **5**, 1-13 (2014).
- 1163 42. Adachi, O., *et al.* Targeted disruption of the MyD88 gene results in loss of IL-1- and IL-18-mediated  
1164 function. *Immunity* **9**, 143-150 (1998).
- 1165 43. Kato, Z., *et al.* The structure and binding mode of interleukin-18. *Nat Struct Biol* **10**, 966-971 (2003).
- 1166 44. Matsumoto, S., *et al.* Interleukin-18 activates NF-kappaB in murine T helper type 1 cells. *Biochem*  
1167 *Biophys Res Commun* **234**, 454-457 (1997).
- 1168 45. Robinson, D., *et al.* IGIF does not drive Th1 development but synergizes with IL-12 for interferon-gamma  
1169 production and activates IRAK and NFkappaB. *Immunity* **7**, 571-581 (1997).
- 1170 46. Kojima, H., *et al.* An essential role for NF-kappa B in IL-18-induced IFN-gamma expression in KG-1 cells. *J*  
1171 *Immunol* **162**, 5063-5069 (1999).
- 1172 47. Morel, J.C., Park, C.C., Kumar, P. & Koch, A.E. Interleukin-18 induces rheumatoid arthritis synovial  
1173 fibroblast CXC chemokine production through NFkappaB activation. *Lab Invest* **81**, 1371-1383 (2001).
- 1174 48. Miyoshi, K., Obata, K., Kondo, T., Okamura, H. & Noguchi, K. Interleukin-18-mediated  
1175 microglia/astrocyte interaction in the spinal cord enhances neuropathic pain processing after nerve injury. *J*  
1176 *Neurosci* **28**, 12775-12787 (2008).

- 1177 49. Kaltschmidt, B. & Kaltschmidt, C. NF-kappaB in the nervous system. *Cold Spring Harb Perspect Biol* **1**,  
1178 a001271 (2009).
- 1179 50. Mattson, M.P. & Meffert, M.K. Roles for NF-kappaB in nerve cell survival, plasticity, and disease. *Cell*  
1180 *Death Differ* **13**, 852-860 (2006).
- 1181 51. Frakes, A.E., *et al.* Microglia induce motor neuron death via the classical NF-kappaB pathway in  
1182 amyotrophic lateral sclerosis. *Neuron* **81**, 1009-1023 (2014).
- 1183 52. Uranishi, H., *et al.* Involvement of the pro-oncoprotein TLS (translocated in liposarcoma) in nuclear  
1184 factor-kappa B p65-mediated transcription as a coactivator. *J Biol Chem* **276**, 13395-13401 (2001).
- 1185 53. Swarup, V., *et al.* Dereglulation of TDP-43 in amyotrophic lateral sclerosis triggers nuclear factor kappaB-  
1186 mediated pathogenic pathways. *J Exp Med* **208**, 2429-2447 (2011).
- 1187 54. Lee, S., Abecasis, G.R., Boehnke, M. & Lin, X. Rare-variant association analysis: study designs and  
1188 statistical tests. *Am J Hum Genet* **95**, 5-23 (2014).
- 1189 55. Project MinE Consortium, Van Rheenen, W. & *et al.* Project MinE: study design and pilot analyses of a  
1190 large-scale whole-genome sequencing study in amyotrophic lateral sclerosis. (2017).
- 1191 56. Dunckley, T., *et al.* Whole-genome analysis of sporadic amyotrophic lateral sclerosis. *N Engl J Med* **357**,  
1192 775-788 (2007).
- 1193 57. Griffiths-Jones, S., Grocock, R.J., van Dongen, S., Bateman, A. & Enright, A.J. miRBase: microRNA  
1194 sequences, targets and gene nomenclature. *Nucleic Acids Res* **34**, D140-144 (2006).
- 1195 58. Liu, X., Jian, X. & Boerwinkle, E. dbNSFP v2.0: a database of human non-synonymous SNVs and their  
1196 functional predictions and annotations. *Hum Mutat* **34**, E2393-2402 (2013).
- 1197 59. Lee, S., *et al.* Optimal unified approach for rare-variant association testing with application to small-  
1198 sample case-control whole-exome sequencing studies. *Am J Hum Genet* **91**, 224-237 (2012).
- 1199 60. Kenna, K.P., *et al.* NEK1 variants confer susceptibility to amyotrophic lateral sclerosis. *Nat Genet* **48**,  
1200 1037-1042 (2016).
- 1201 61. Rosen, D.R., *et al.* Mutations in Cu/Zn superoxide dismutase gene are associated with familial  
1202 amyotrophic lateral sclerosis. *Nature* **362**, 59-62 (1993).
- 1203 62. Chio, A., *et al.* Prevalence of SOD1 mutations in the Italian ALS population. *Neurology* **70**, 533-537  
1204 (2008).
- 1205 63. van der Spek, R.A.A., *et al.* The project MinE databrowser: bringing large-scale whole-genome  
1206 sequencing in ALS to researchers and the public. *Amyotroph Lateral Scler Frontotemporal Degener* **20**, 432-440  
1207 (2019).

- 1208 64. O'Leary, N.A., *et al.* Reference sequence (RefSeq) database at NCBI: current status, taxonomic  
1209 expansion, and functional annotation. *Nucleic Acids Res* **44**, D733-745 (2016).
- 1210 65. Smith, L., *et al.* Establishing the UK DNA Bank for motor neuron disease (MND). *BMC genetics* **16**, 84-84  
1211 (2015).
- 1212 66. Shi, Y., *et al.* Haploinsufficiency leads to neurodegeneration in C9ORF72 ALS/FTD human induced motor  
1213 neurons. *Nature medicine* **24**, 313 (2018).
- 1214 67. Haukedal, H. & Freude, K. Implications of Microglia in Amyotrophic Lateral Sclerosis and Frontotemporal  
1215 Dementia. *J Mol Biol* **431**, 1818-1829 (2019).
- 1216 68. Haenseler, W., *et al.* A Highly Efficient Human Pluripotent Stem Cell Microglia Model Displays a  
1217 Neuronal-Co-culture-Specific Expression Profile and Inflammatory Response. *Stem Cell Reports* **8**, 1727-1742  
1218 (2017).
- 1219 69. Peng, S.S., Chen, C.Y., Xu, N. & Shyu, A.B. RNA stabilization by the AU-rich element binding protein, HuR,  
1220 an ELAV protein. *EMBO J* **17**, 3461-3470 (1998).
- 1221 70. Fan, X.C. & Steitz, J.A. Overexpression of HuR, a nuclear-cytoplasmic shuttling protein, increases the in  
1222 vivo stability of ARE-containing mRNAs. *EMBO J* **17**, 3448-3460 (1998).
- 1223 71. Stellos, K., *et al.* Adenosine-to-inosine RNA editing controls cathepsin S expression in atherosclerosis by  
1224 enabling HuR-mediated post-transcriptional regulation. *Nat Med* **22**, 1140-1150 (2016).
- 1225 72. Brennan, C.M. & Steitz, J.A. HuR and mRNA stability. *Cell Mol Life Sci* **58**, 266-277 (2001).
- 1226 73. Garcia-Dominguez, D.J., Morello, D., Cisneros, E., Kontoyiannis, D.L. & Frade, J.M. Stabilization of Dll1  
1227 mRNA by Elavl1/HuR in neuroepithelial cells undergoing mitosis. *Mol Biol Cell* **22**, 1227-1239 (2011).
- 1228 74. Rothamel, K., *et al.* ELAVL1 primarily couples mRNA stability with the 3' UTRs of interferon-stimulated  
1229 genes. *Cell Rep* **35**, 109178 (2021).
- 1230 75. Mukherjee, N., *et al.* Integrative regulatory mapping indicates that the RNA-binding protein HuR couples  
1231 pre-mRNA processing and mRNA stability. *Mol Cell* **43**, 327-339 (2011).
- 1232 76. Fernandopulle, M.S., *et al.* Transcription Factor-Mediated Differentiation of Human iPSCs into Neurons.  
1233 *Curr Protoc Cell Biol* **79**, e51 (2018).
- 1234 77. Christian, F., Smith, E.L. & Carmody, R.J. The Regulation of NF-kappaB Subunits by Phosphorylation. *Cells*  
1235 **5** (2016).
- 1236 78. Zhong, H., May, M.J., Jimi, E. & Ghosh, S. The phosphorylation status of nuclear NF-kappa B determines  
1237 its association with CBP/p300 or HDAC-1. *Mol Cell* **9**, 625-636 (2002).
- 1238 79. Zhong, H., Voll, R.E. & Ghosh, S. Phosphorylation of NF-kappa B p65 by PKA stimulates transcriptional  
1239 activity by promoting a novel bivalent interaction with the coactivator CBP/p300. *Mol Cell* **1**, 661-671 (1998).

- 1240 80. Oeckinghaus, A. & Ghosh, S. The NF-kappaB family of transcription factors and its regulation. *Cold Spring*  
1241 *Harb Perspect Biol* **1**, a000034 (2009).
- 1242 81. Waelchli, R., *et al.* Design and preparation of 2-benzamido-pyrimidines as inhibitors of IKK. *Bioorg Med*  
1243 *Chem Lett* **16**, 108-112 (2006).
- 1244 82. Ayers, K.L., *et al.* A loss of function variant in CASP7 protects against Alzheimer's disease in homozygous  
1245 APOE epsilon4 allele carriers. *BMC Genomics* **17 Suppl 2**, 445 (2016).
- 1246 83. Benitez, B.A., *et al.* Missense variant in TREML2 protects against Alzheimer's disease. *Neurobiol Aging*  
1247 **35**, 1510 e1519-1526 (2014).
- 1248 84. Jonsson, T., *et al.* A mutation in APP protects against Alzheimer's disease and age-related cognitive  
1249 decline. *Nature* **488**, 96-99 (2012).
- 1250 85. Sims, R., *et al.* Rare coding variants in PLCG2, ABI3, and TREM2 implicate microglial-mediated innate  
1251 immunity in Alzheimer's disease. *Nat Genet* (2017).
- 1252 86. Landers, J.E., *et al.* Reduced expression of the Kinesin-Associated Protein 3 (KIFAP3) gene increases  
1253 survival in sporadic amyotrophic lateral sclerosis. *Proc Natl Acad Sci U S A* **106**, 9004-9009 (2009).
- 1254 87. Farhan, S.M.K., *et al.* Exome sequencing in amyotrophic lateral sclerosis implicates a novel gene,  
1255 DNAJC7, encoding a heat-shock protein. *Nat Neurosci* **22**, 1966-1974 (2019).
- 1256 88. Lambrechts, D., *et al.* VEGF is a modifier of amyotrophic lateral sclerosis in mice and humans and  
1257 protects motoneurons against ischemic death. *Nat Genet* **34**, 383-394 (2003).
- 1258 89. Beers, D.R. & Appel, S.H. Immune dysregulation in amyotrophic lateral sclerosis: Mechanisms and  
1259 emerging therapies. *The Lancet Neurology* **18**, 211-220 (2019).
- 1260 90. Zhan, X., Hu, Y., Li, B., Abecasis, G.R. & Liu, D.J. RVTESTS: an efficient and comprehensive tool for rare  
1261 variant association analysis using sequence data. *Bioinformatics* **32**, 1423-1426 (2016).
- 1262 91. Raczy, C., *et al.* Isaac: ultra-fast whole-genome secondary analysis on Illumina sequencing platforms.  
1263 *Bioinformatics* **29**, 2041-2043 (2013).
- 1264 92. Tyner, C., *et al.* The UCSC Genome Browser database: 2017 update. *Nucleic Acids Res* **45**, D626-D634  
1265 (2017).
- 1266 93. Danecek, P., *et al.* The variant call format and VCFtools. *Bioinformatics* **27**, 2156-2158 (2011).
- 1267 94. Wang, K., Li, M. & Hakonarson, H. ANNOVAR: functional annotation of genetic variants from high-  
1268 throughput sequencing data. *Nucleic Acids Res* **38**, e164 (2010).
- 1269 95. Agarwal, V., Bell, G.W., Nam, J.W. & Bartel, D.P. Predicting effective microRNA target sites in mammalian  
1270 mRNAs. *Elife* **4** (2015).

- 1271 96. Schildge, S., Bohrer, C., Beck, K. & Schachtrup, C. Isolation and culture of mouse cortical astrocytes. *J Vis*  
1272 *Exp* (2013).
- 1273 97. Hsu, P.D., *et al.* DNA targeting specificity of RNA-guided Cas9 nucleases. *Nat Biotechnol* **31**, 827-832  
1274 (2013).
- 1275 98. Doench, J.G., *et al.* Optimized sgRNA design to maximize activity and minimize off-target effects of  
1276 CRISPR-Cas9. *Nat Biotechnol* **34**, 184-191 (2016).
- 1277 99. Xu, H., *et al.* Sequence determinants of improved CRISPR sgRNA design. *Genome Res* **25**, 1147-1157  
1278 (2015).
- 1279 100. Chari, R., Mali, P., Moosburner, M. & Church, G.M. Unraveling CRISPR-Cas9 genome engineering  
1280 parameters via a library-on-library approach. *Nat Methods* **12**, 823-826 (2015).
- 1281 101. Erijman, A., Dantes, A., Bernheim, R., Shifman, J.M. & Peleg, Y. Transfer-PCR (TPCR): a highway for DNA  
1282 cloning and protein engineering. *J Struct Biol* **175**, 171-177 (2011).
- 1283 102. Peleg, Y. & Unger, T. Application of the Restriction-Free (RF) cloning for multicomponents assembly.  
1284 *Methods Mol Biol* **1116**, 73-87 (2014).
- 1285 103. Kohen, R., *et al.* UTAP: User-friendly Transcriptome Analysis Pipeline. *BMC Bioinformatics* **20**, 154  
1286 (2019).
- 1287 104. Liao, Y., Wang, J., Jaehnig, E.J., Shi, Z. & Zhang, B. WebGestalt 2019: gene set analysis toolkit with  
1288 revamped UIs and APIs. *Nucleic Acids Res* **47**, W199-W205 (2019).
- 1289 105. Lorenz, R., *et al.* ViennaRNA Package 2.0. *Algorithms Mol Biol* **6**, 26 (2011).
- 1290 106. Krach, F., *et al.* Transcriptome–pathology correlation identifies interplay between TDP-43 and the  
1291 expression of its kinase CK1E in sporadic ALS. *Acta neuropathologica* **136**, 405-423 (2018).
- 1292 107. Thompson, L. iMN (Exp 2)—ALS. *SMA and control (unaffected) iMN cell lines differentiated from iPS cell*  
1293 *lines using a long differentiation protocol—RNA-seq., LINCS (collection)* (2017).

1294
